# Supplementary material for: An Arabidopsis lipid map reveals differences between tissues and dynamic changes throughout development
Source: PubMed Central journal article supplement (PMC8361726; doi:10.1111/tpj.15278), 2021-05-24

Lipids are abbreviated as follows: phosphatidylcholines (PC), phosphatidylethanolamines (PE), phosphatidylglycerols (PG), phosphatidylinositols (PI), phosphatidylserines (PS), phosphatidic acids (PA), lysophosphatidylcholines (LPC), lysophosphatidylethanolamines (LPE), Ceramide alpha-hydroxy fatty acid-phytosphingosine (Cer-AP), Hexosylceramide alpha-hydroxy fatty acid-phytosphingosine (Hex-Cer-AP), digalactosyldiacylglycerols (DGDG), monogalactosyldiacylglycerols (MGDG), sulfoquinovosyldiacylglycerols (SQDG), acyl diacylglycerol glucuronide (ADGGA), diacylglycerols (DG) and triacylglycerols (TG).

Figures S1 (a-f), S2 (a-f) and S4 (a-f): The magenta-coloured bars represent lipids, which show significantly higher lipid levels and while blue colour bars represent lipids, which show significantly lower lipid levels at different growth stages of a tissue. Non-significant differences are shown in light pink or blue. The light pink-coloured bars represent lipids, which are present at higher levels while the light blue bars represent lipids, which are present in lower levels at different growth stages of a tissue.

Figure S3 (a-g): The purple-coloured bars represent lipids, which have changed significantly in 14 d old seedlings compared to 7 d old seedlings. The green-coloured bars represent lipids, which have changed significantly in 21 d old seedlings compared to 14 d old seedlings. Non-significant changes are shown by bars with a dotted pattern.

Figure S5 (a-h): The blue-coloured bars represent lipids, which have changed significantly in 1.2 cm long siliques compared to 1 cm long siliques. The green-coloured bars represent lipids, which have changed significantly in 1.5 cm long siliques compared to 1.2 cm long siliques. Non-significant changes are shown by bars with a dotted pattern.

Figure S1(a-f) Log<sub>2</sub> fold change comparison of the levels of lipid species in the 24 d old rosettes compared to 14 d old rosettes (Log<sub>2</sub> 24d/14d)

(a)

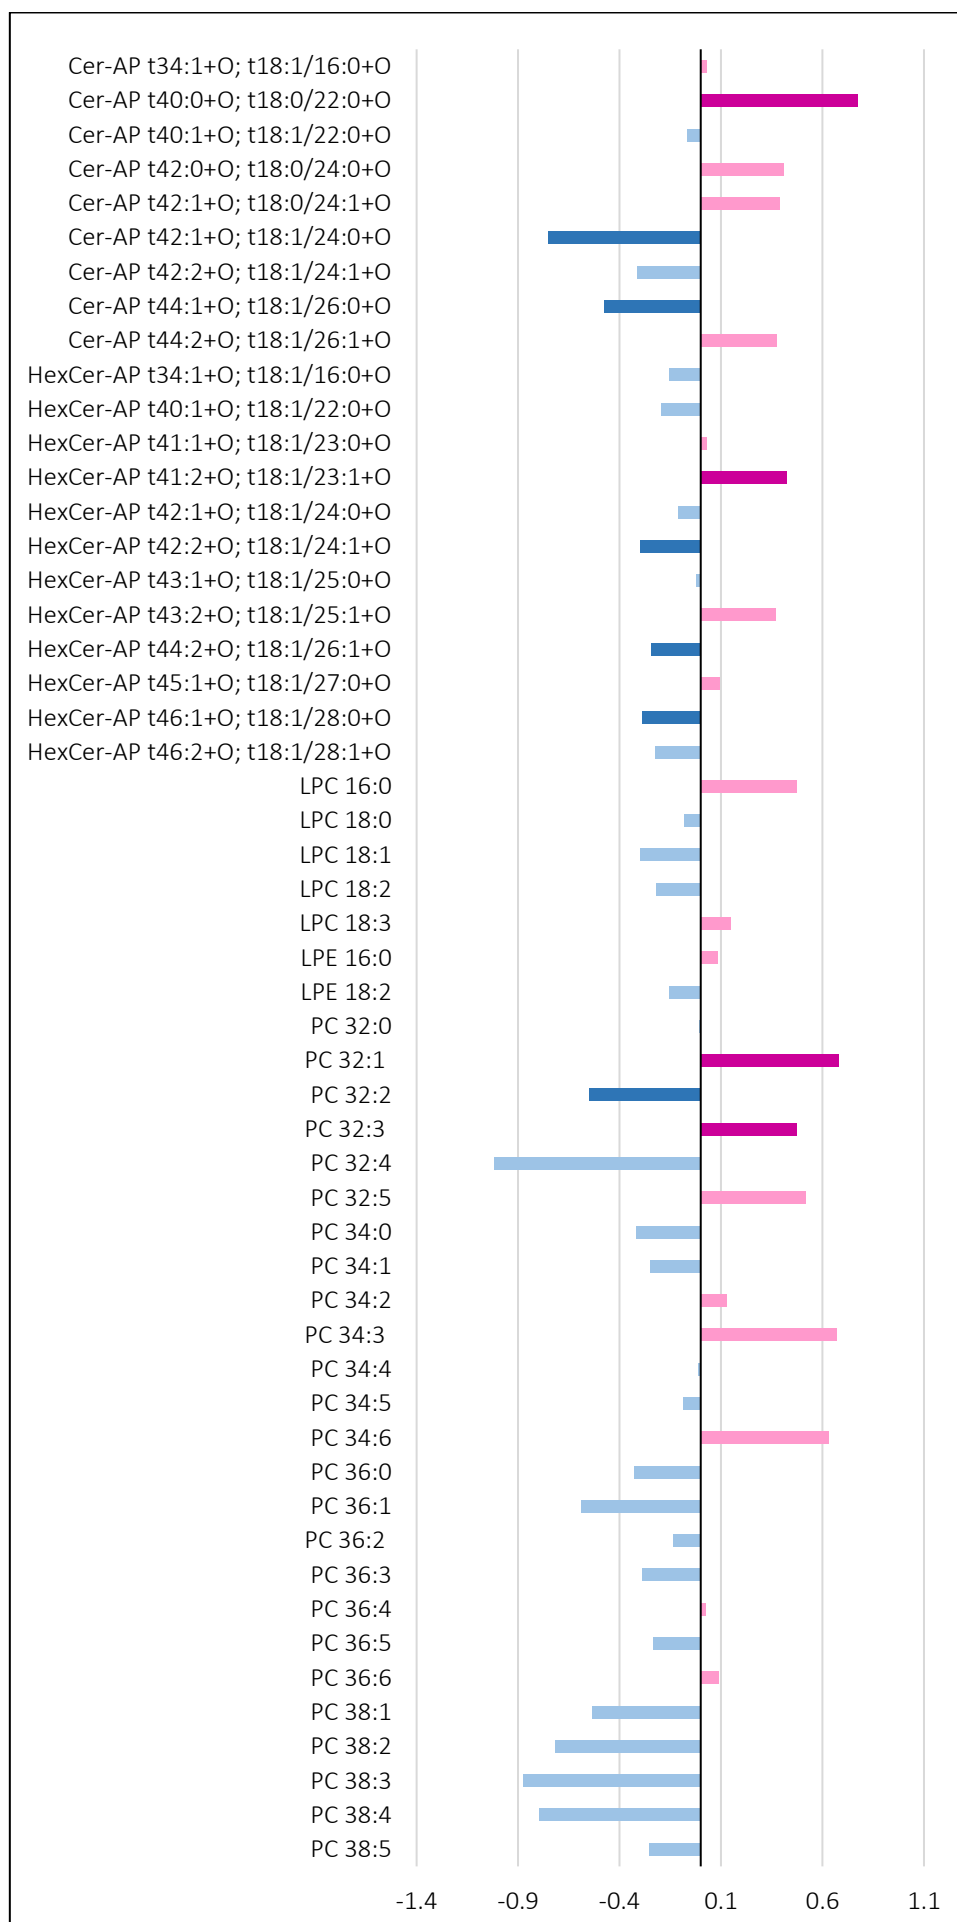

(b)

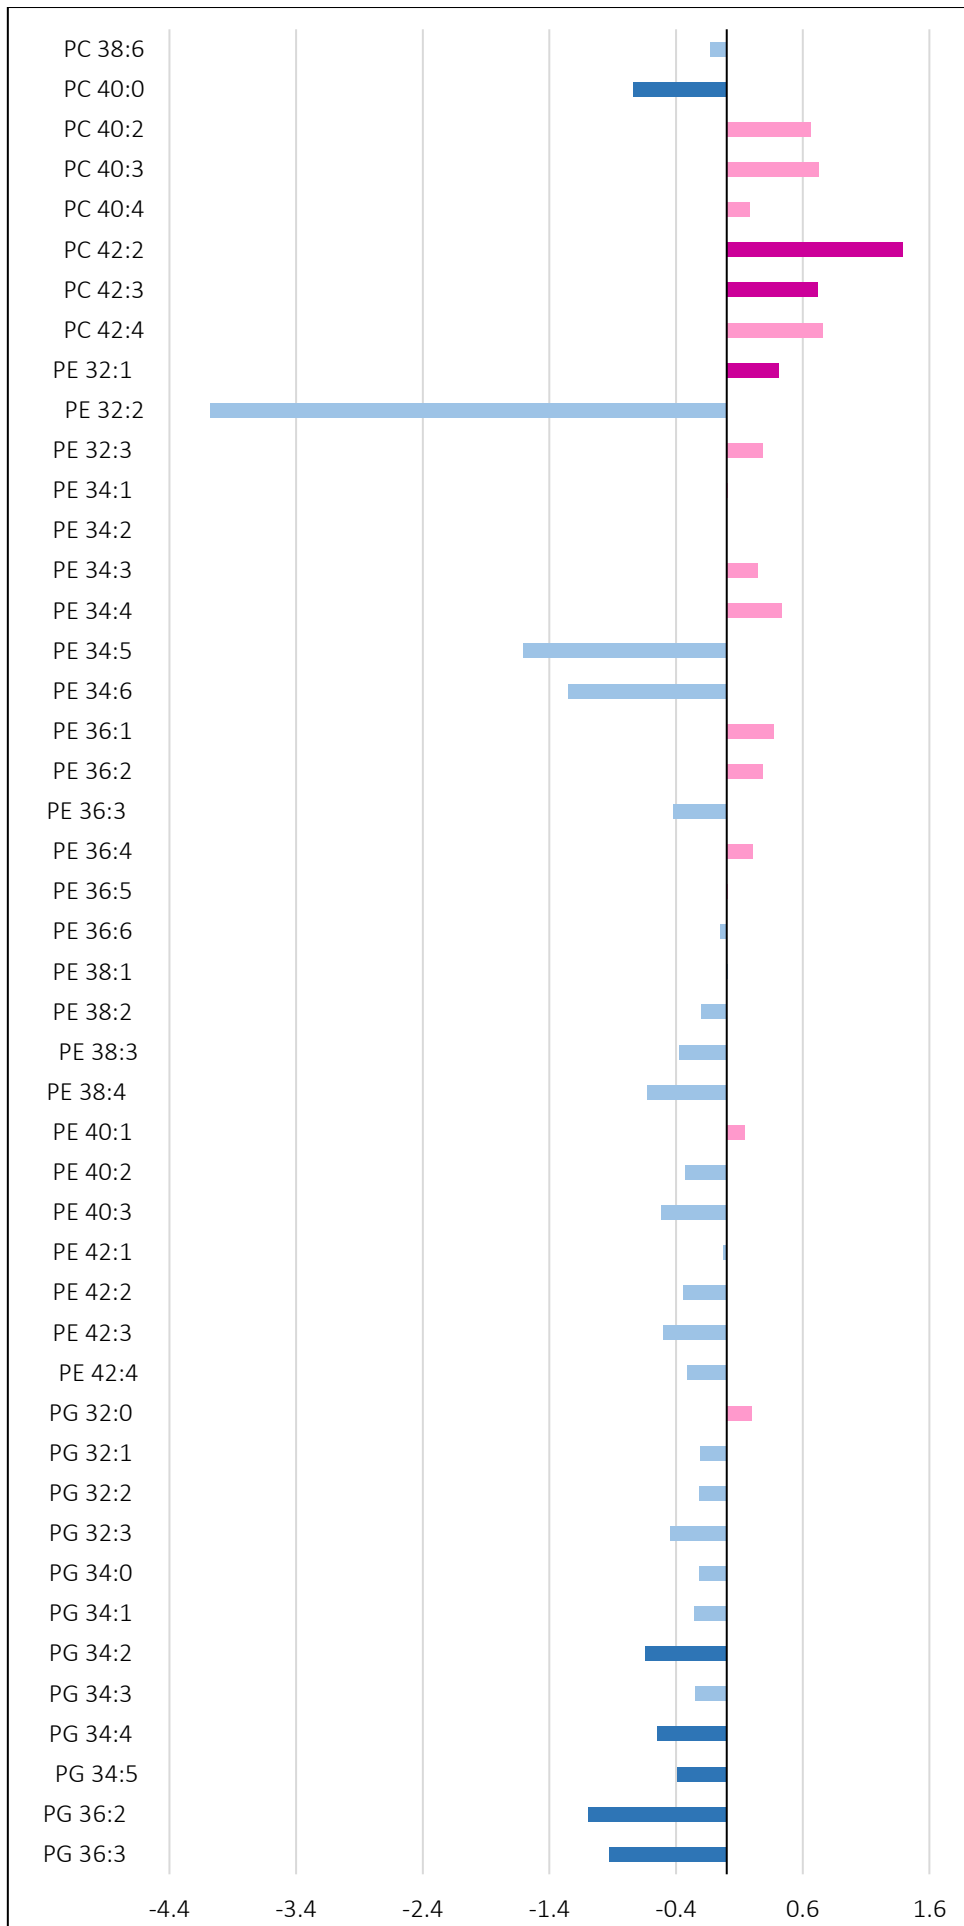

(c)

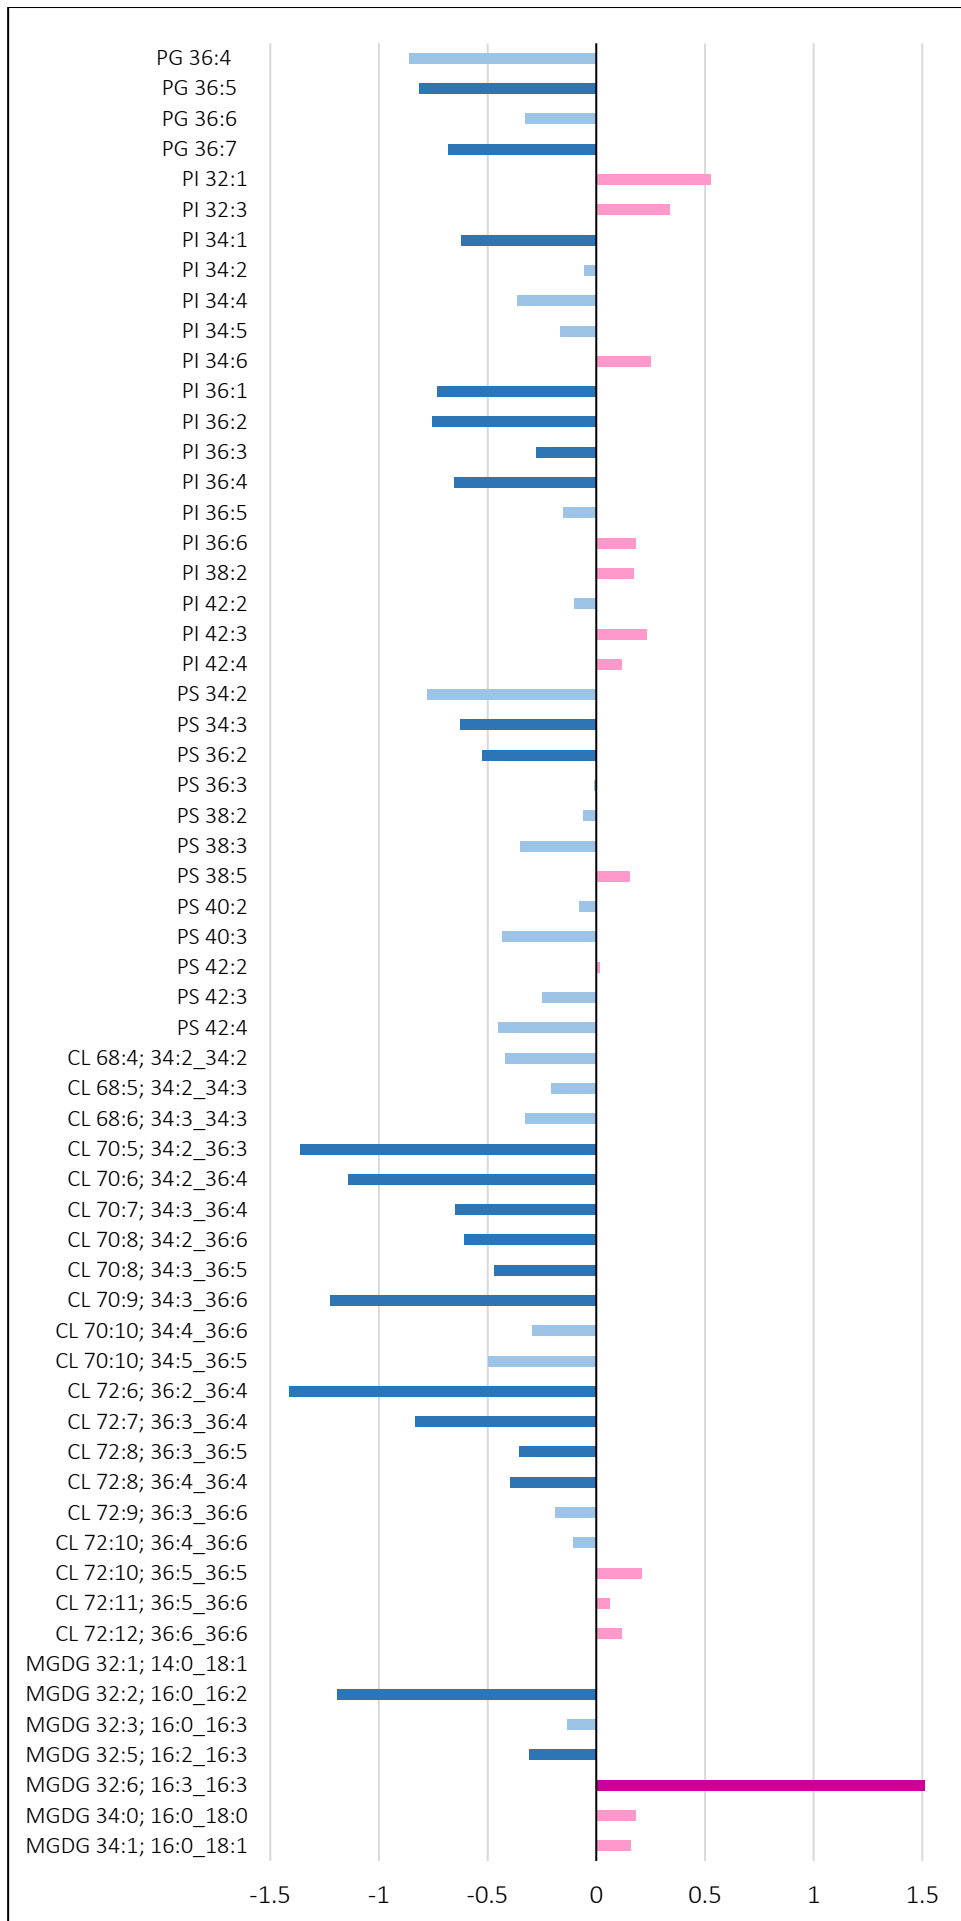

(d)

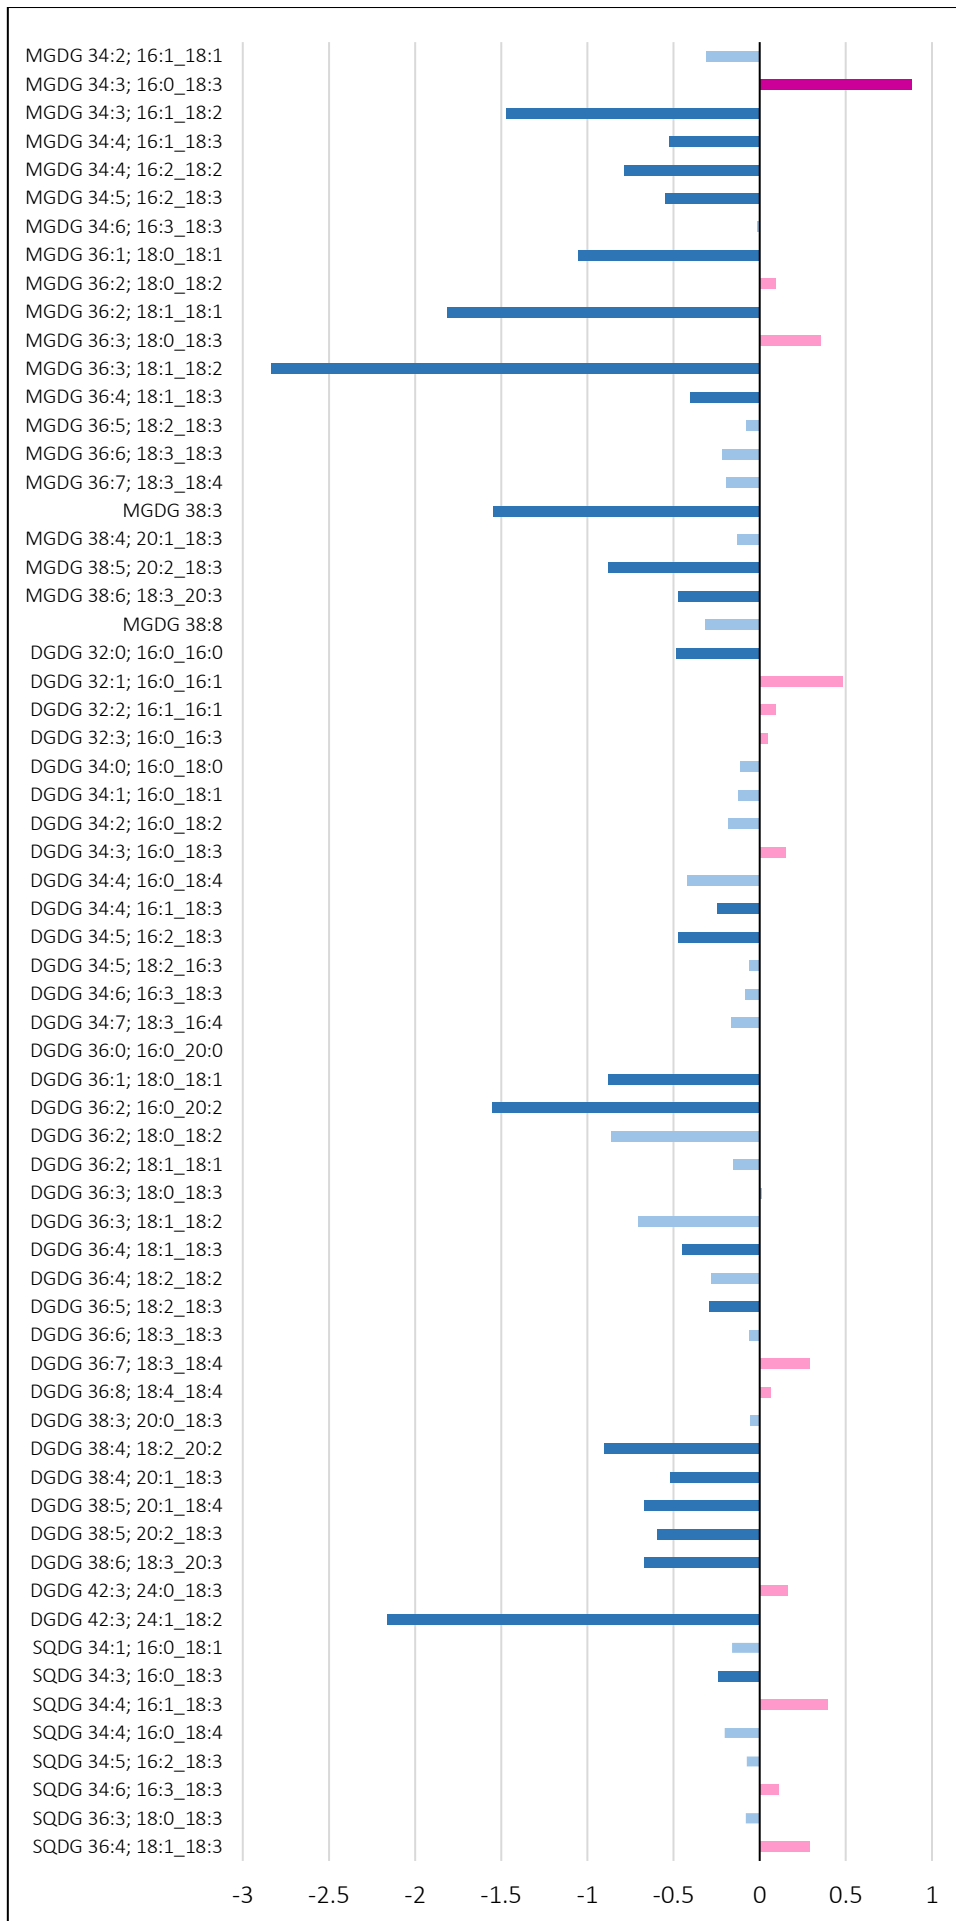

(e)

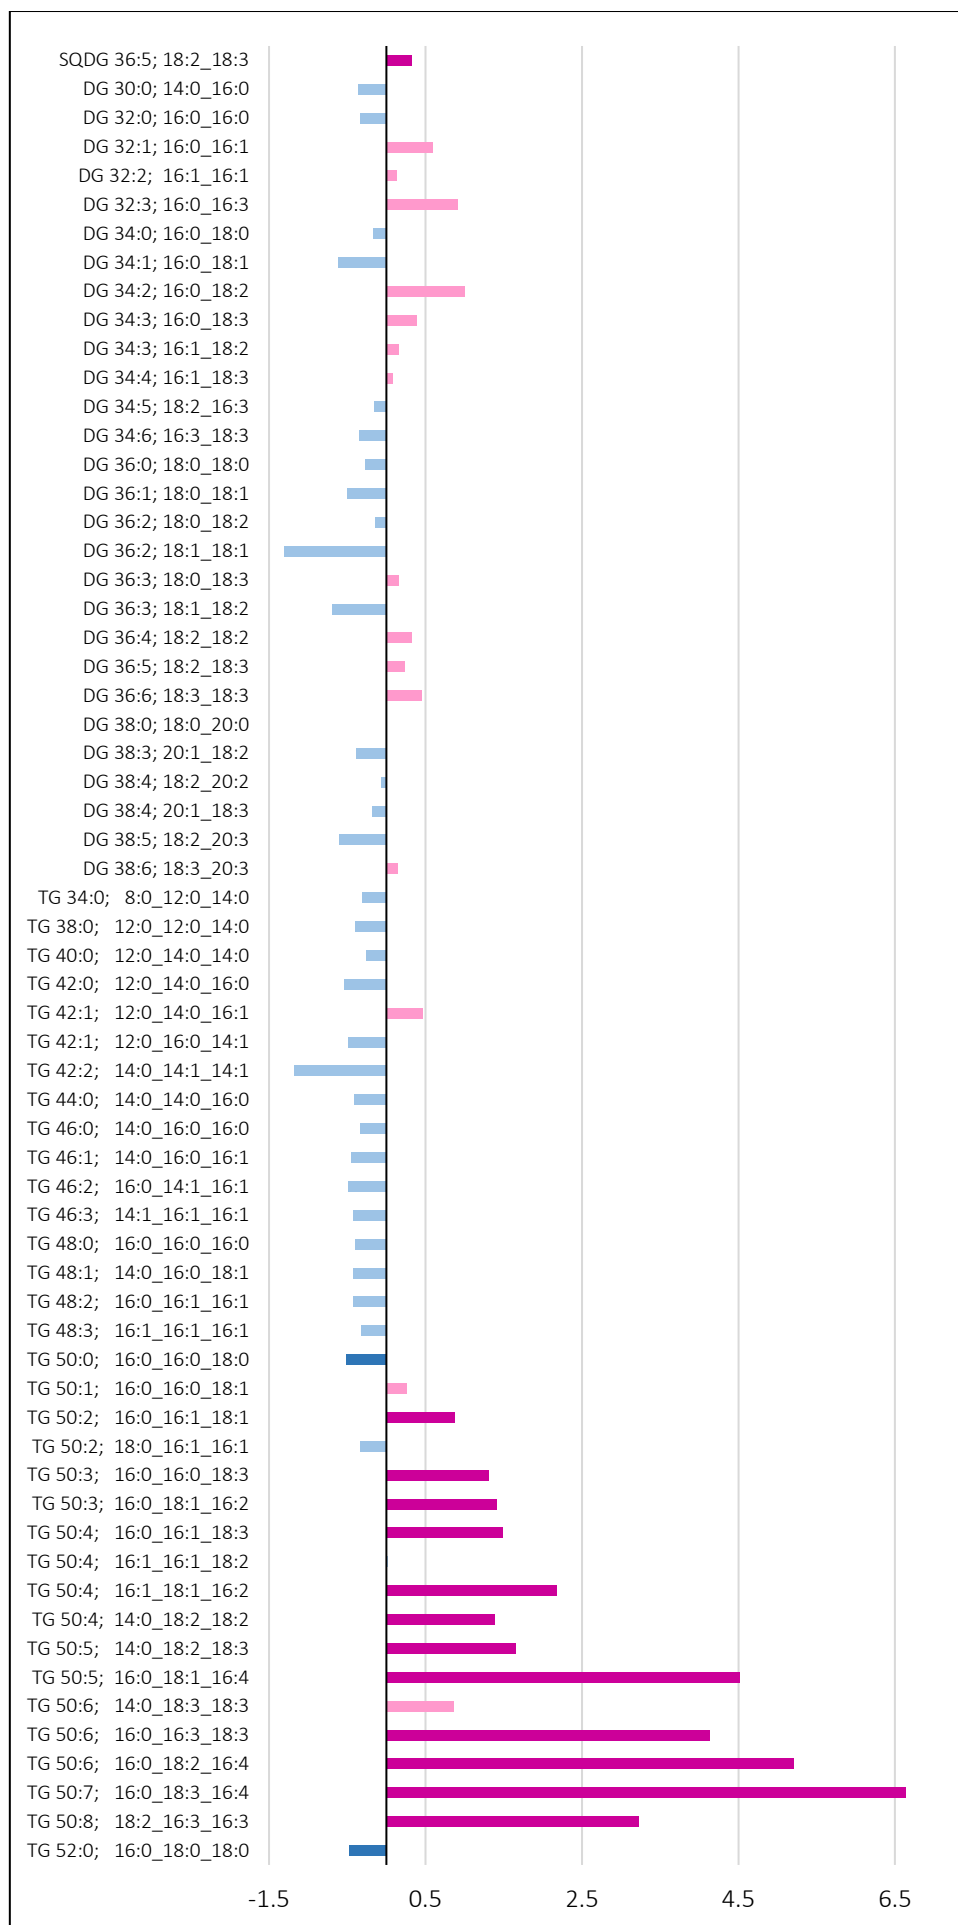

(f)

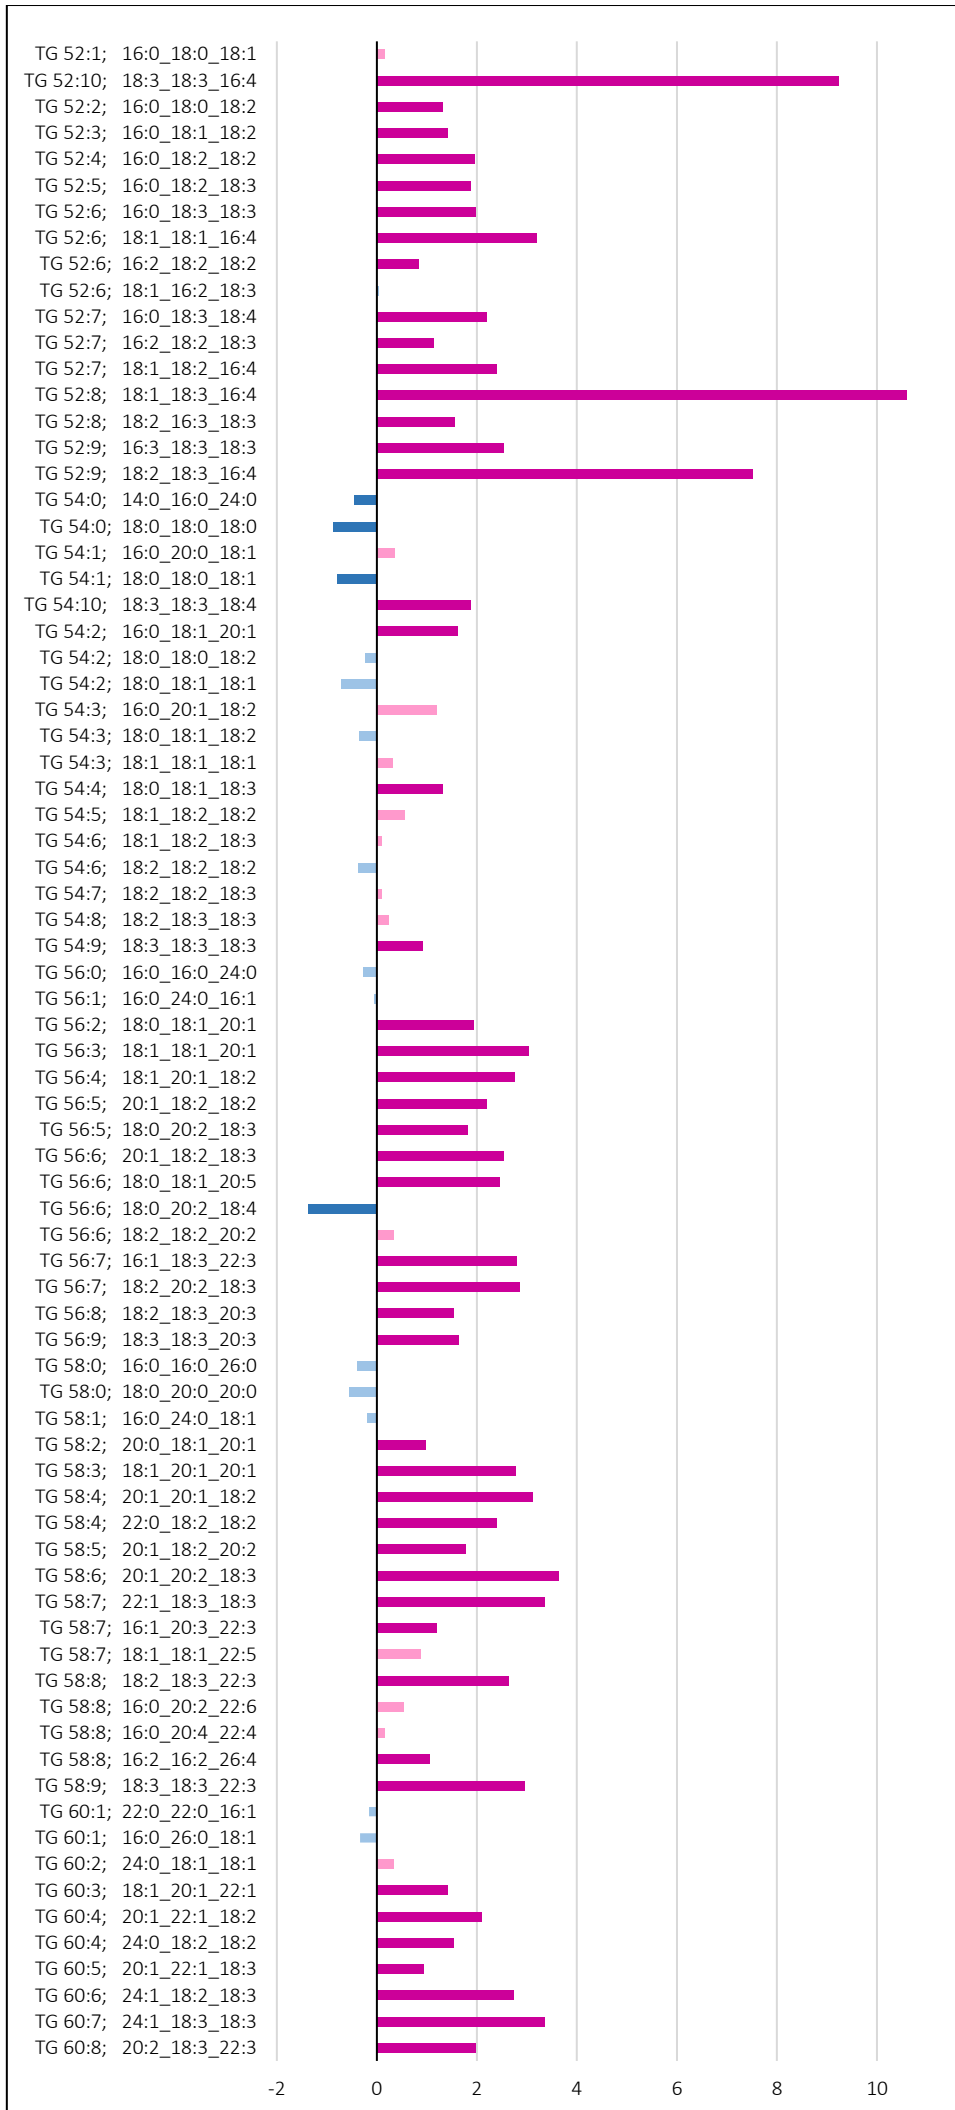

Figure S2 (a-f) Log2 fold change comparison of the levels of lipid species in the second leaf of 17d old plants compared to the seventh leaf ( $\text{Log}_2$  2<sup>nd</sup> leaf/7<sup>th</sup> leaf)

(a)

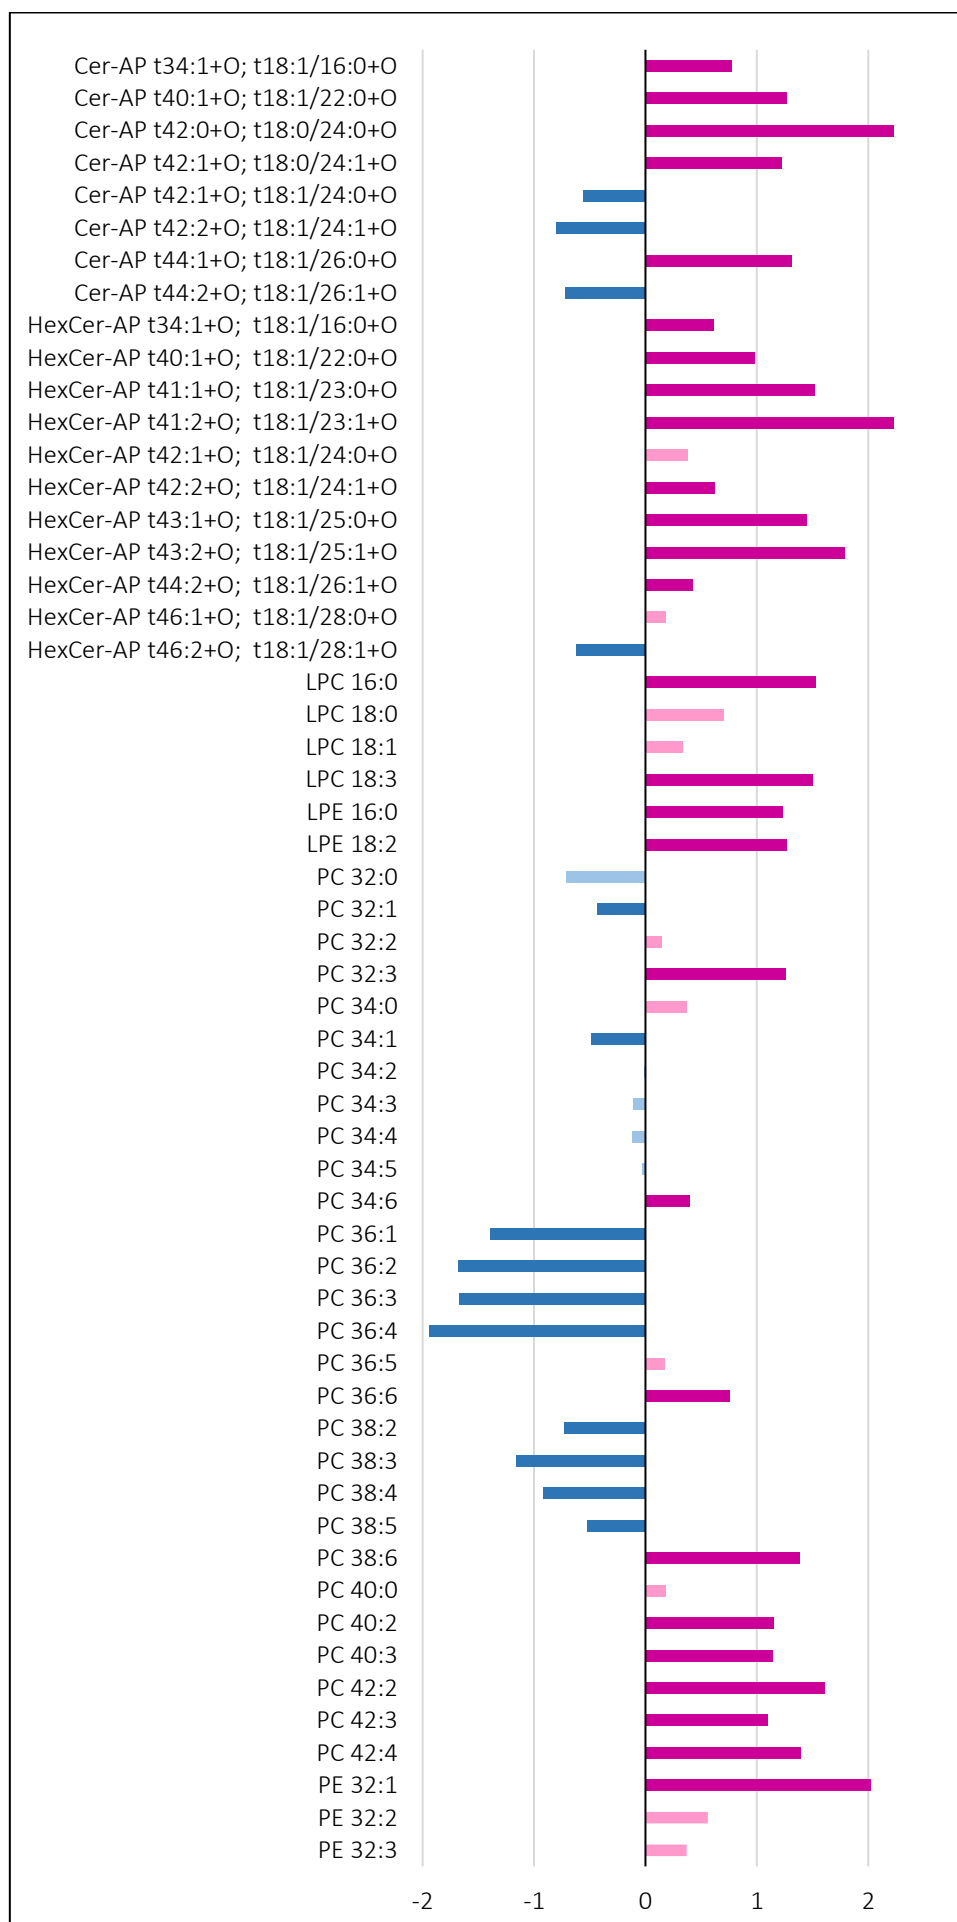



(b)

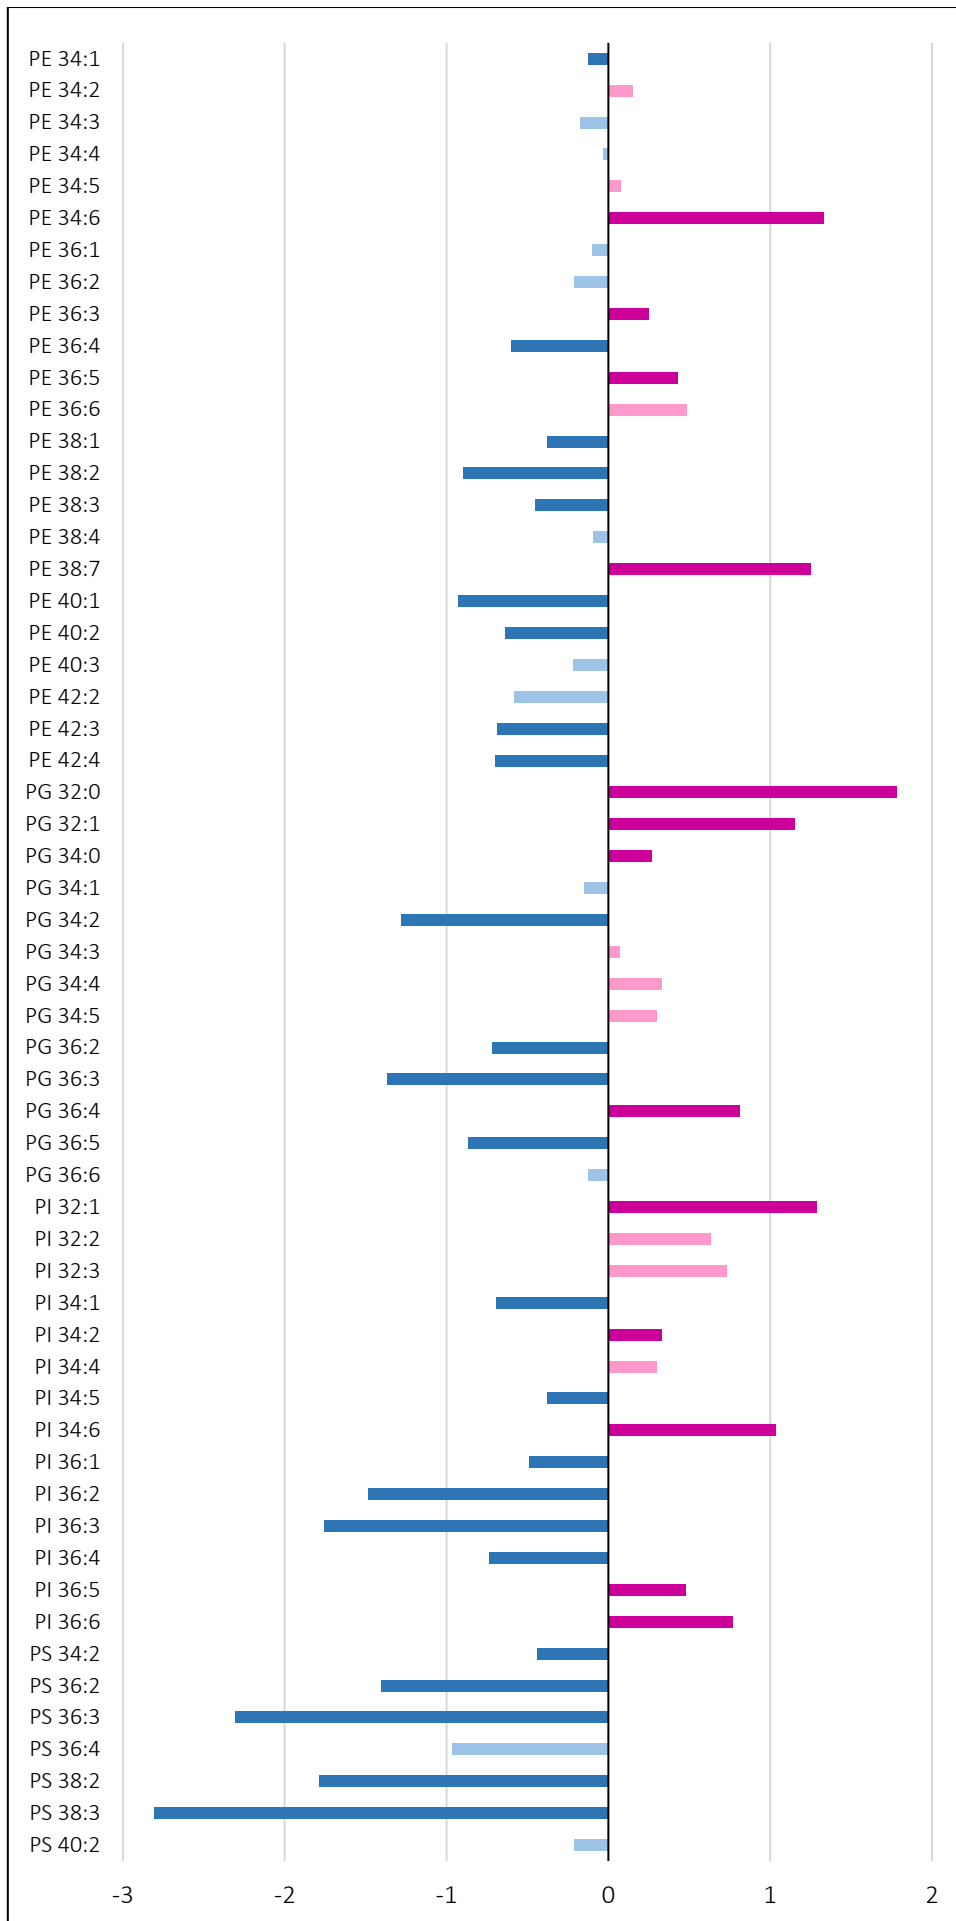

(c)

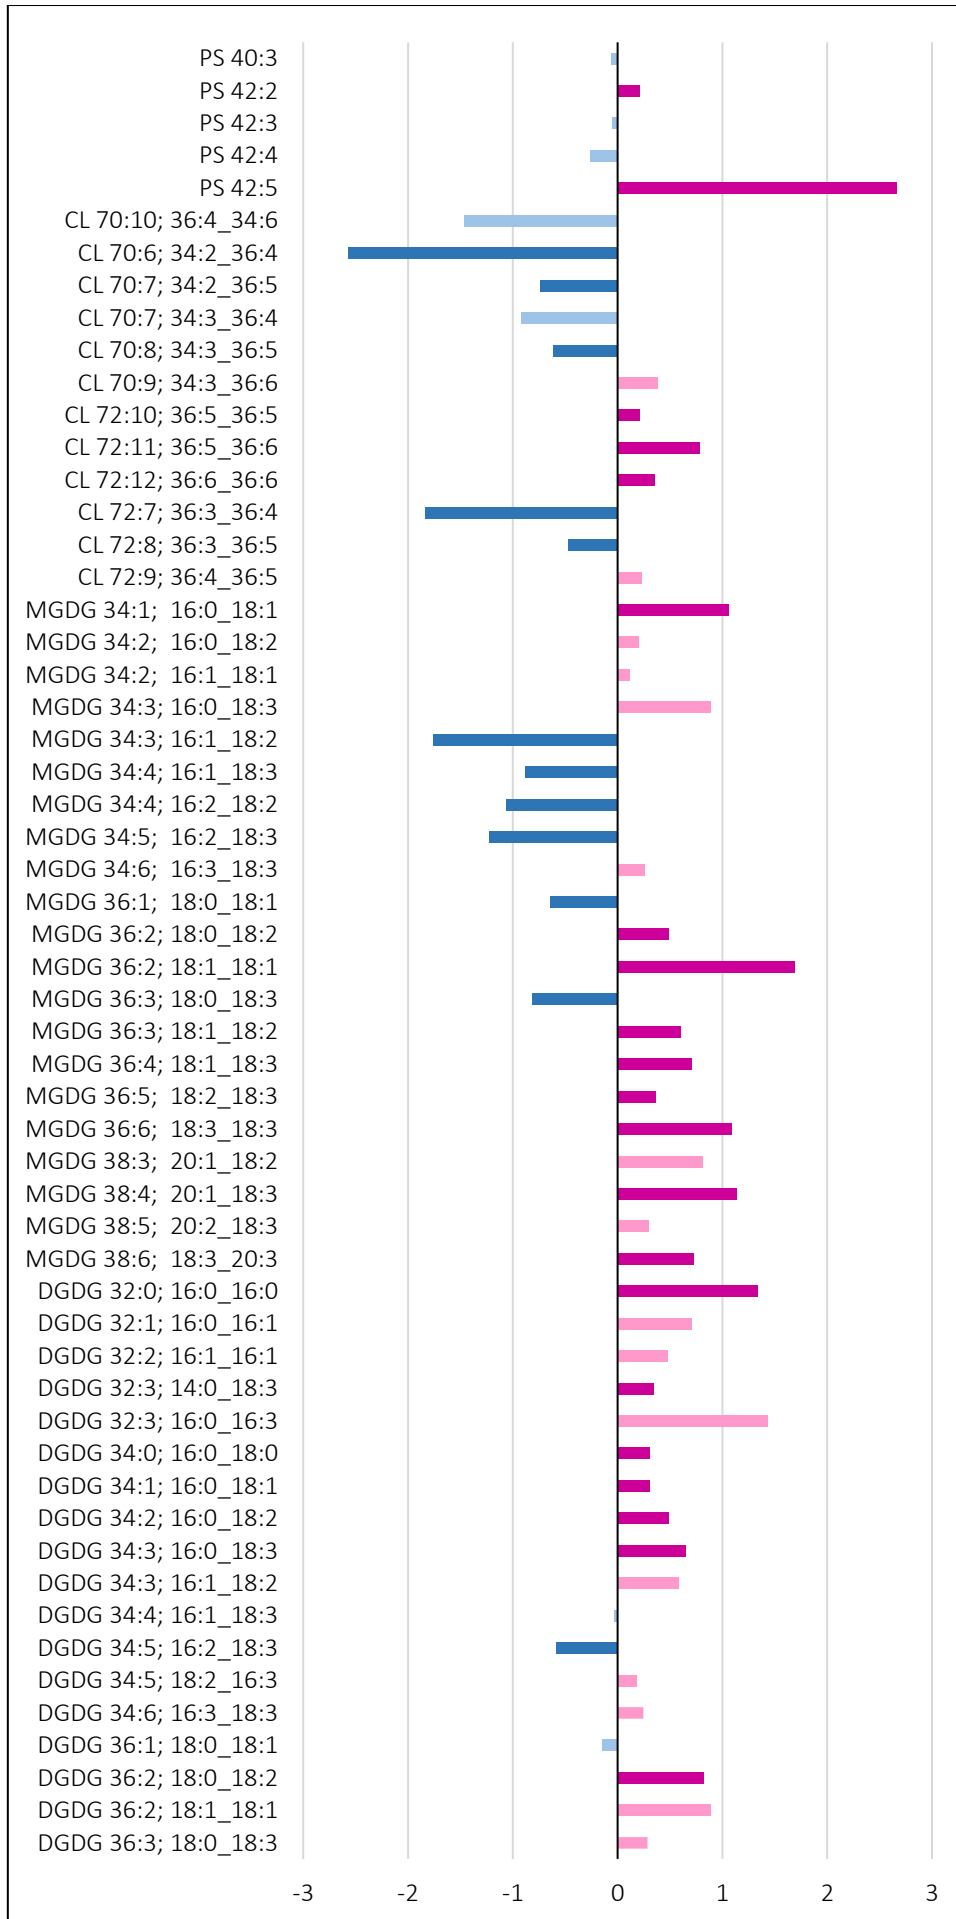

(d)

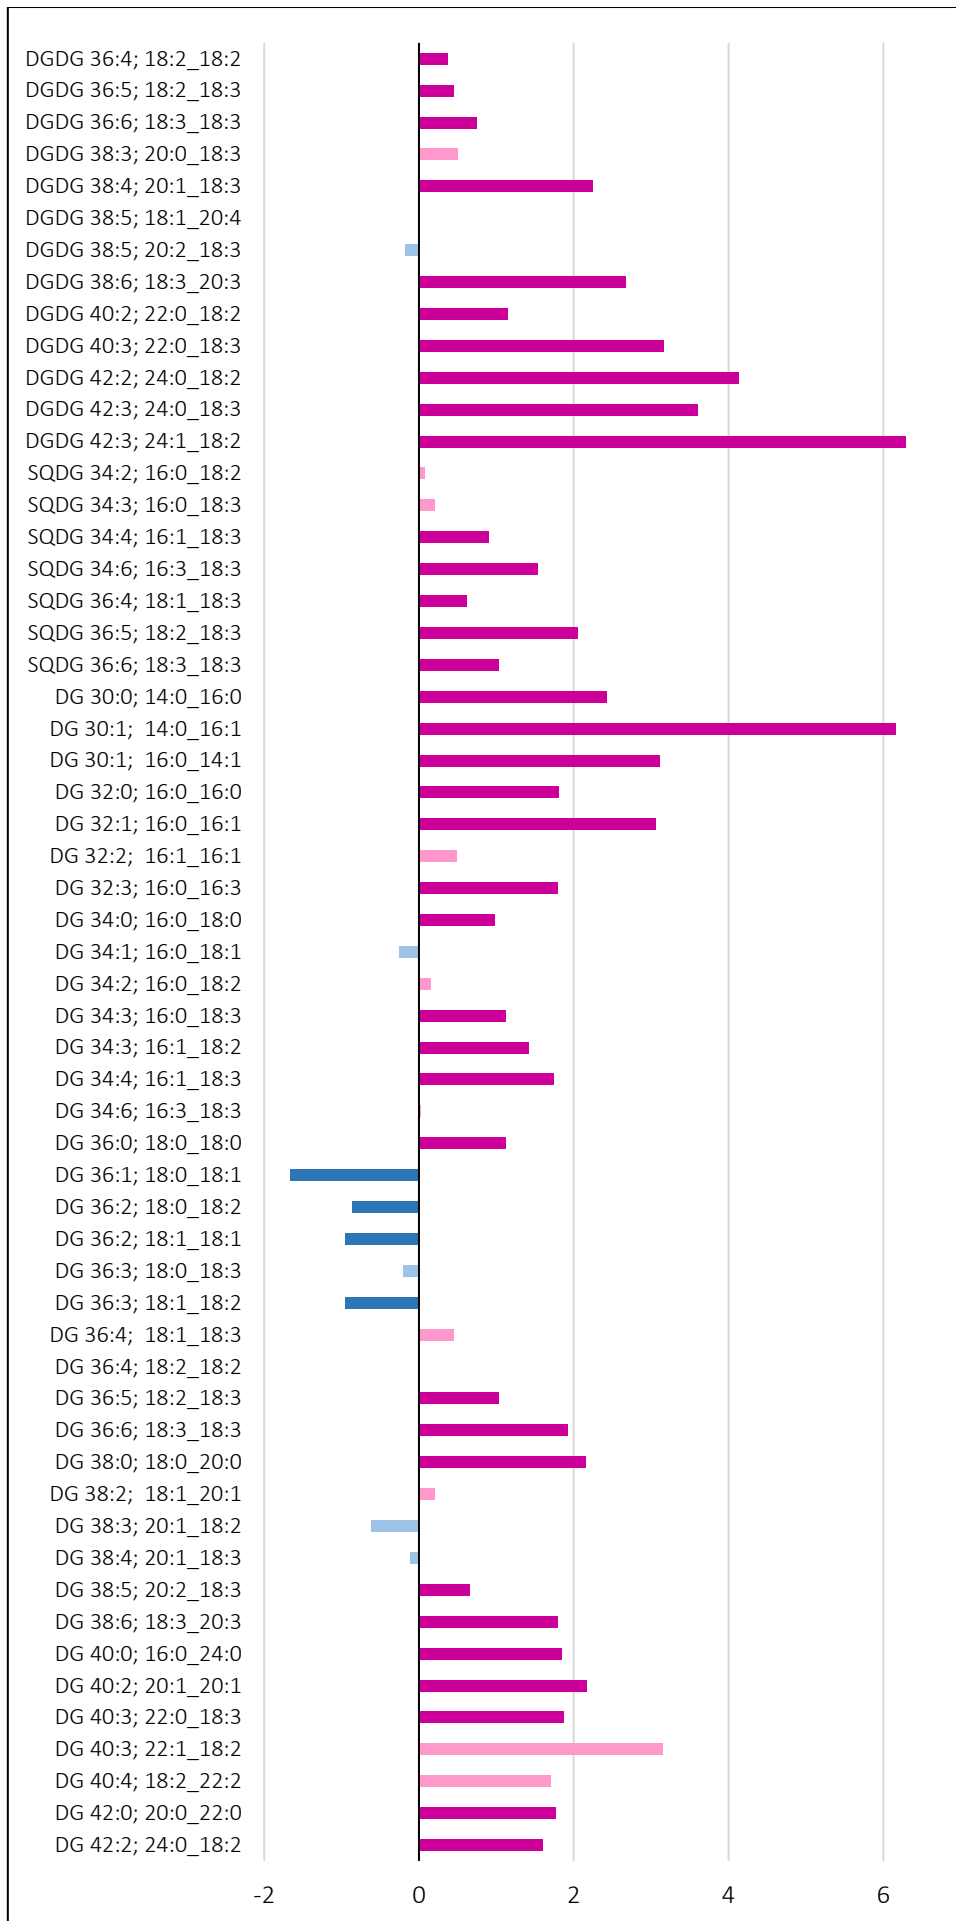

(e)

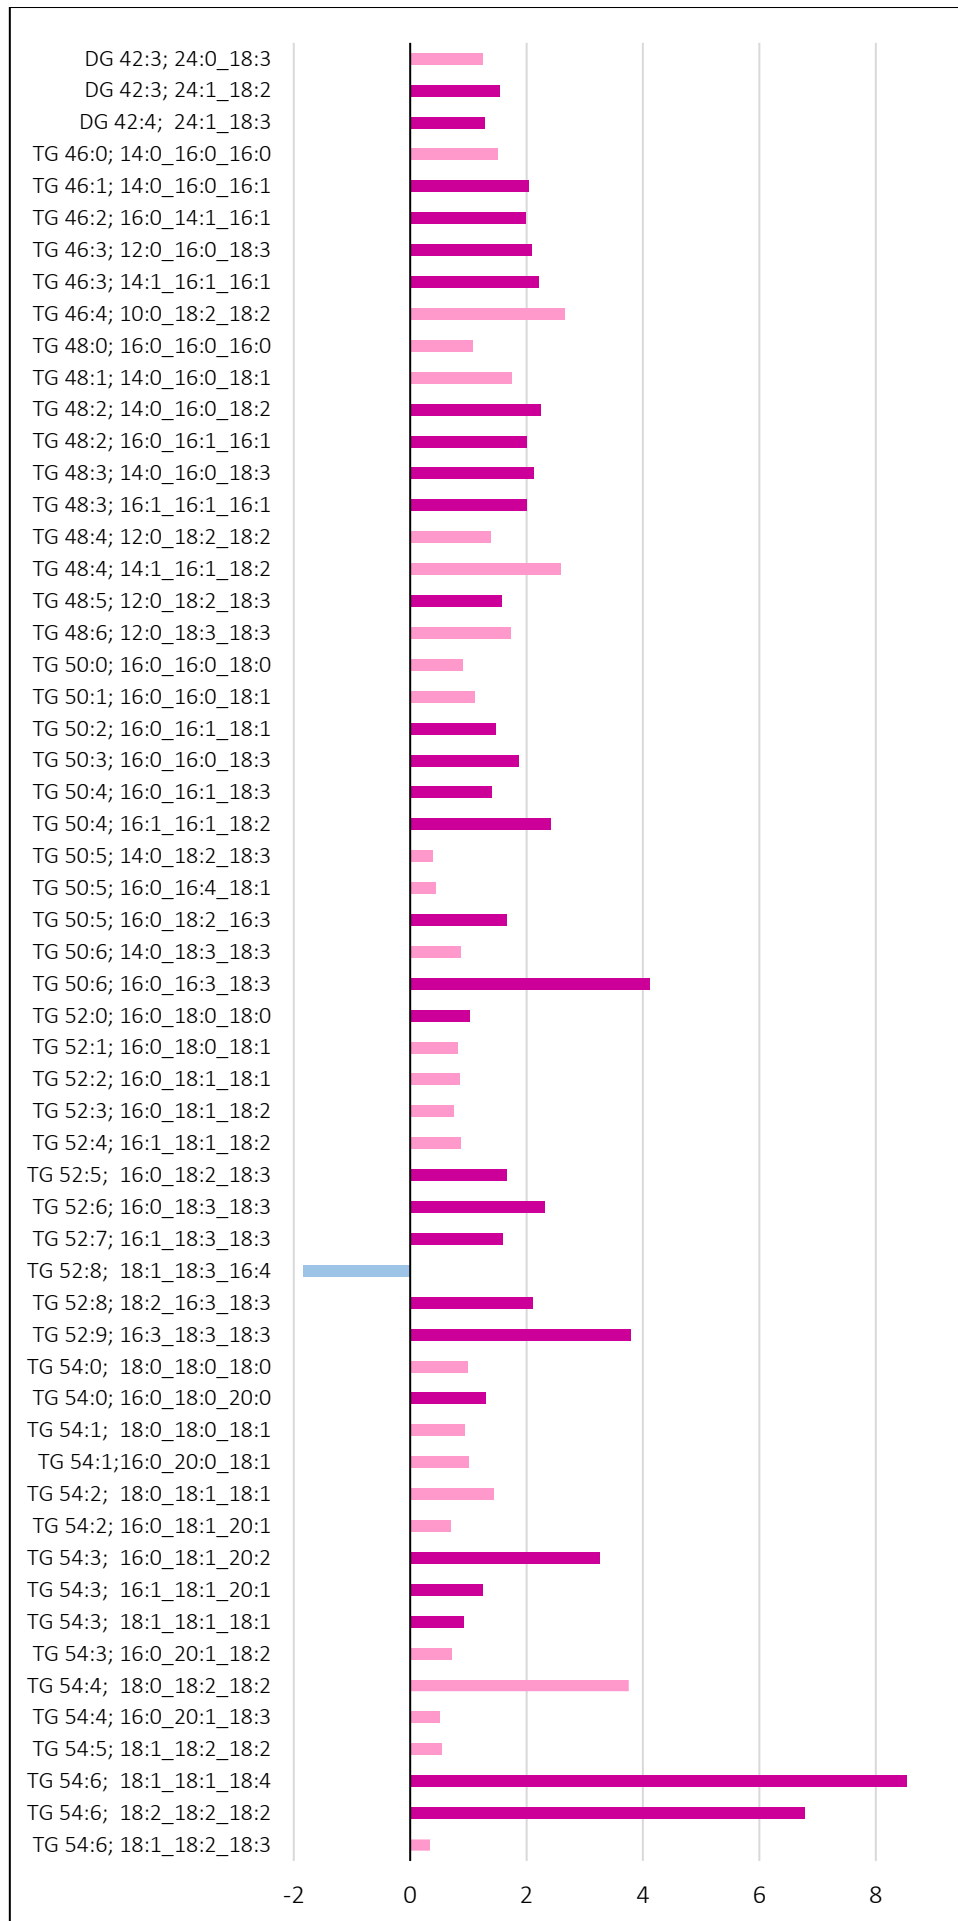

(f)

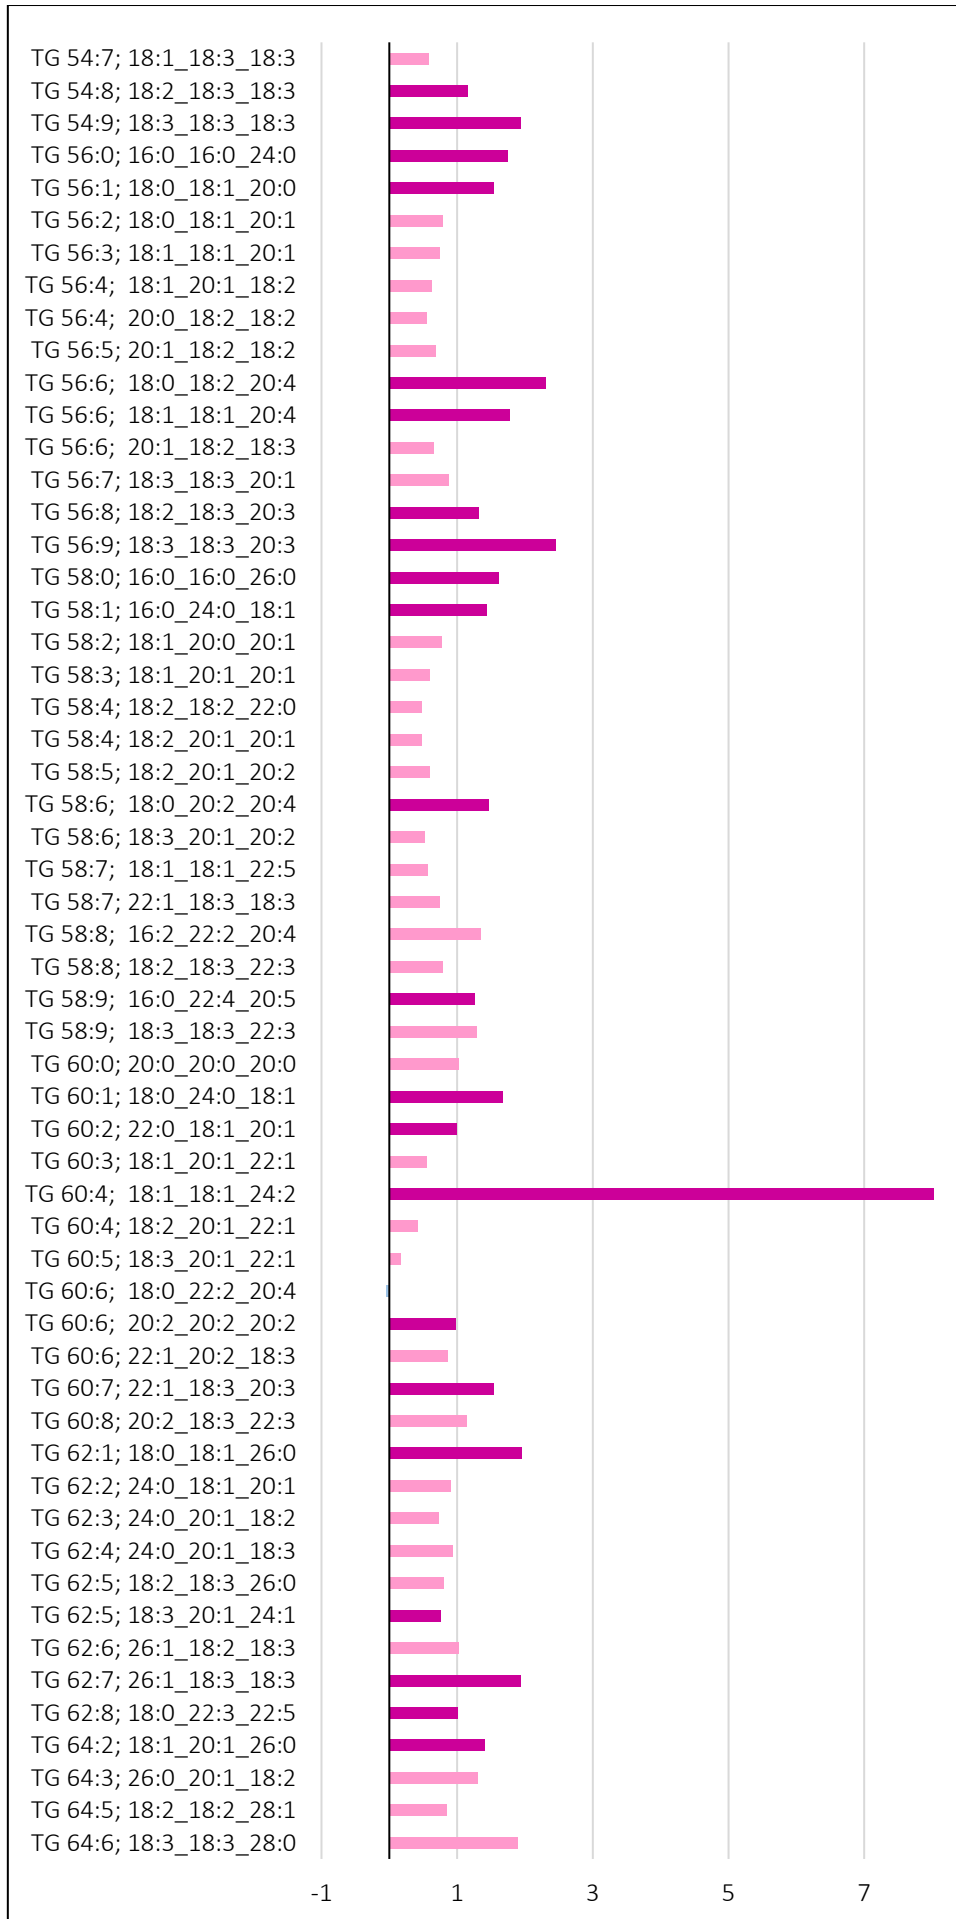

Figure S3 (a-g) Log2 fold change comparison of the levels of lipid species in 14 d old seedlings compared to 7 d old seedlings ( $\text{Log}_2 14\text{d}/7\text{d}$ ) (purple) and in 21 d old seedlings compared to 14 d old seedlings ( $\text{Log}_2 21/14\text{d}$ ) (green)

(a)

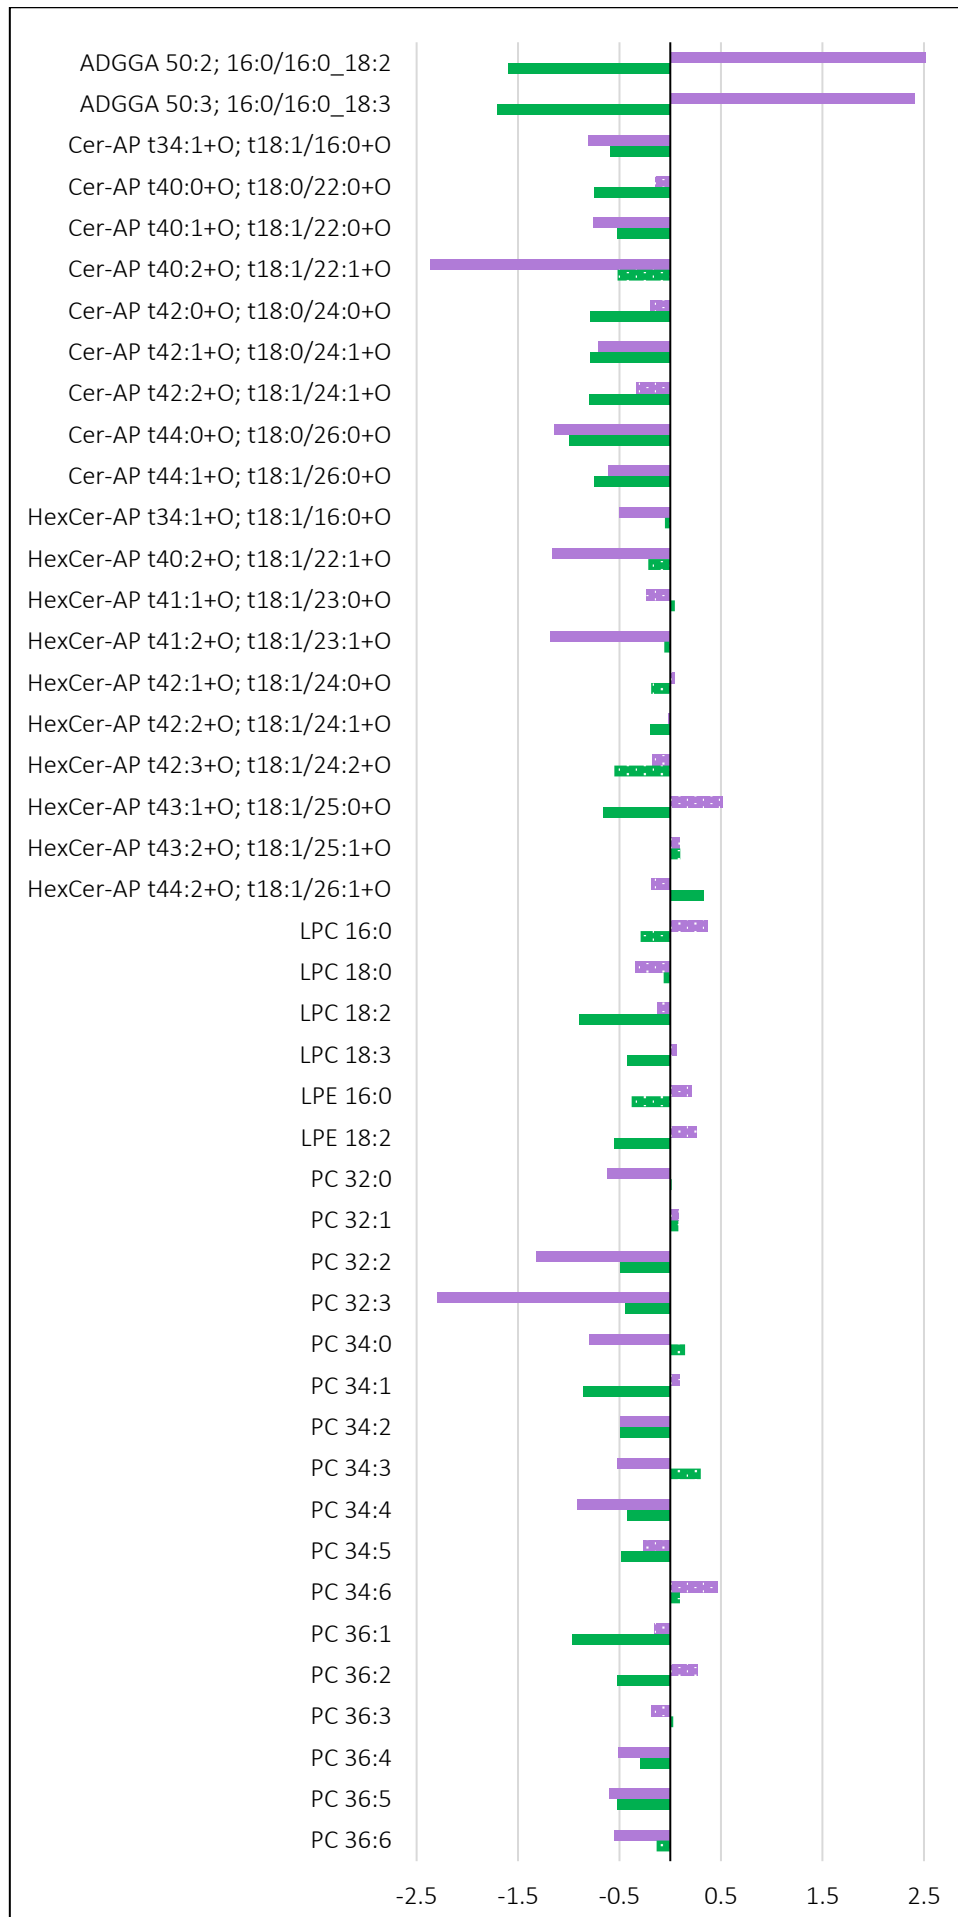

(b)

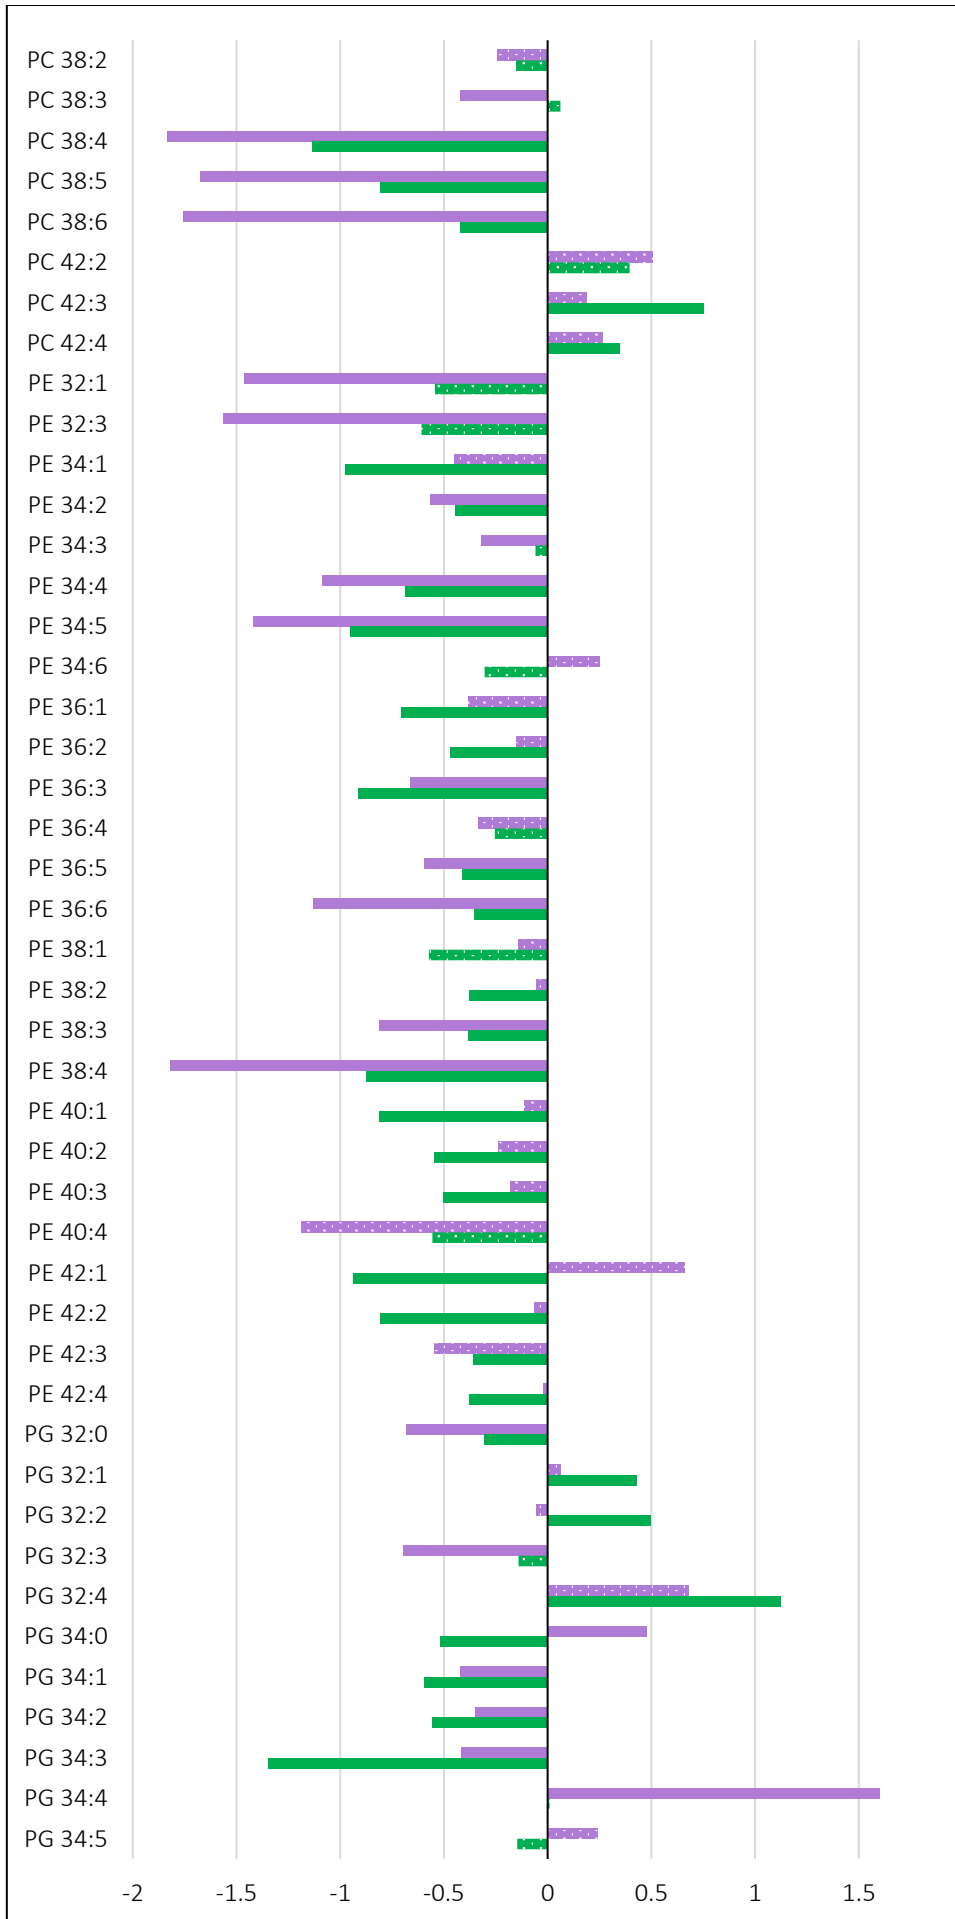

(c)

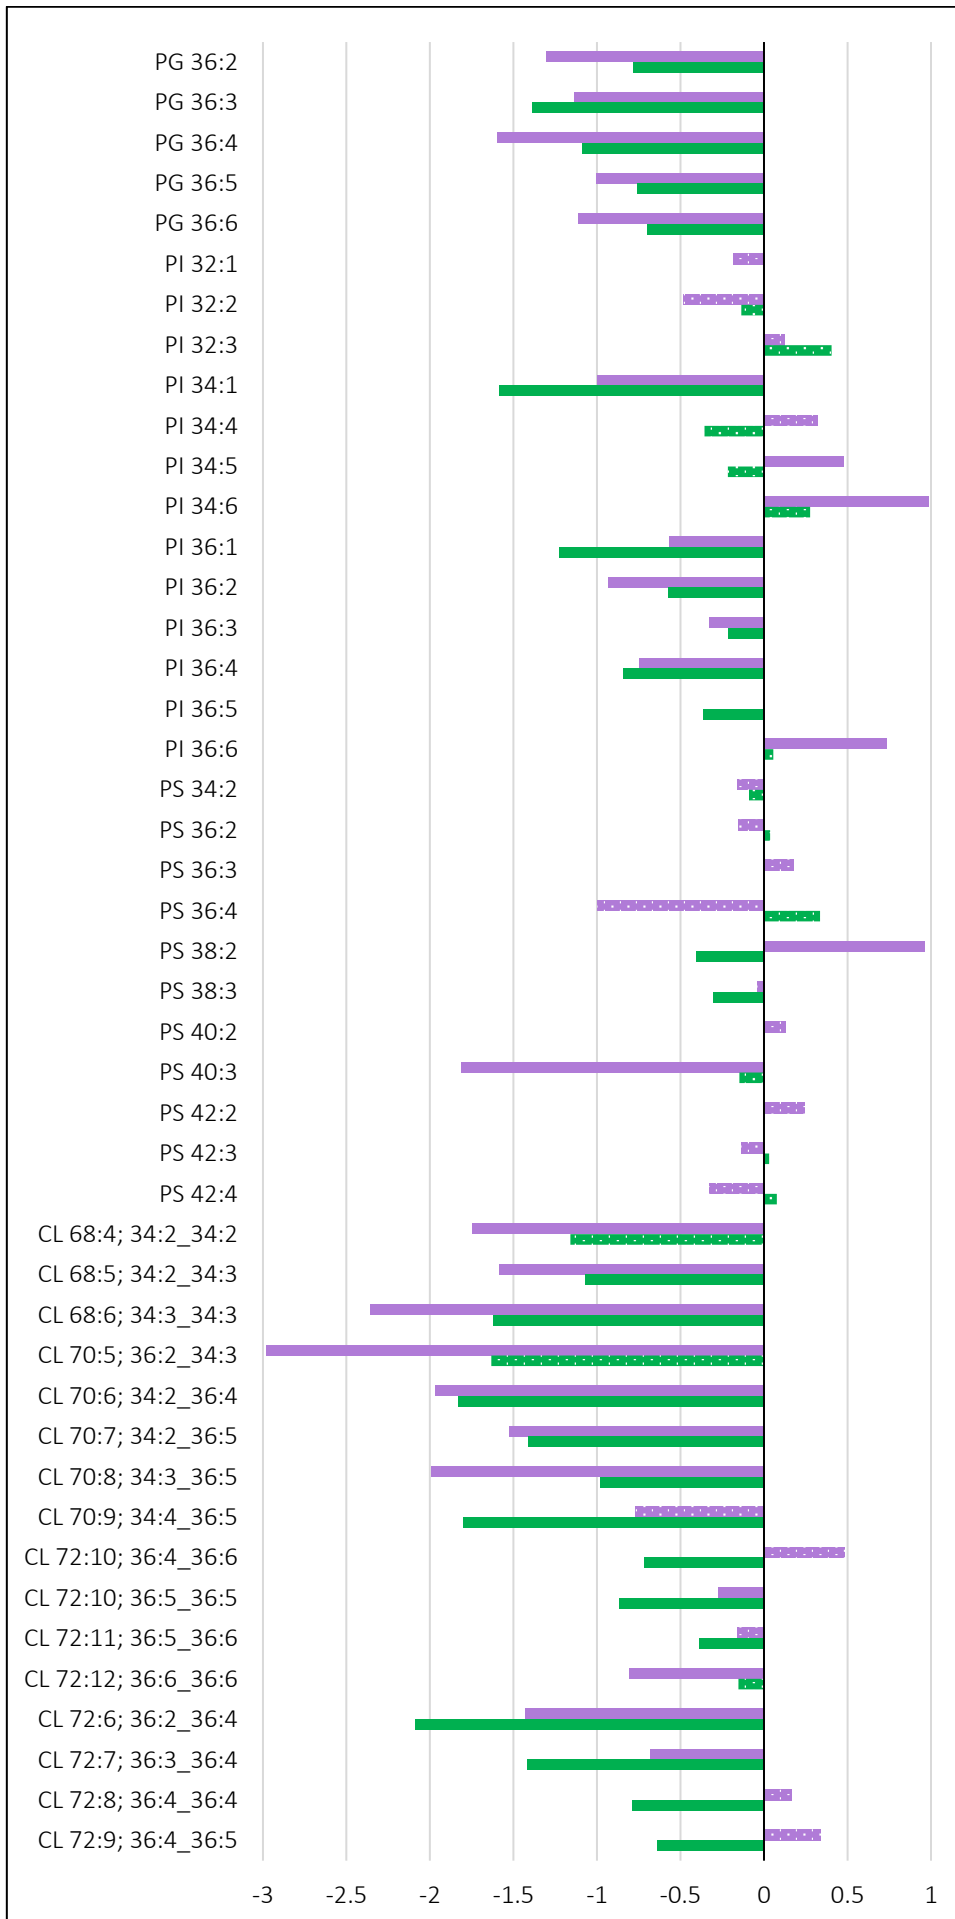



(d)

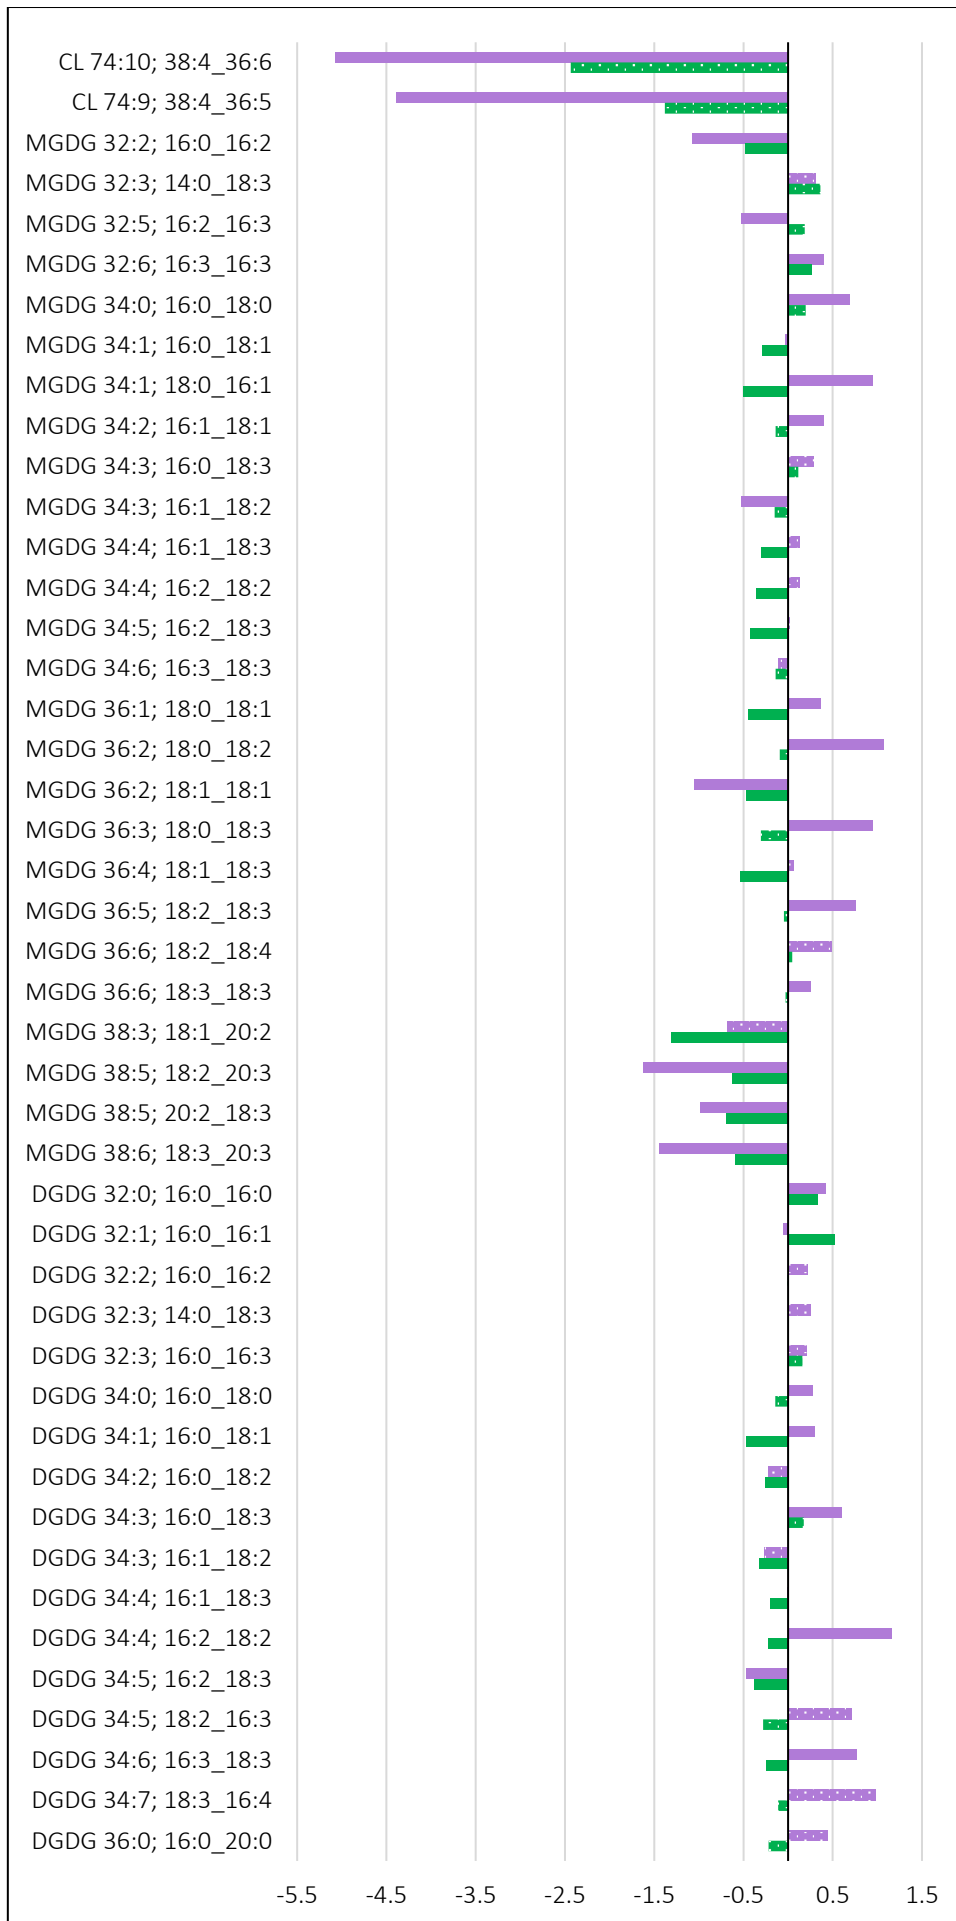

(e)

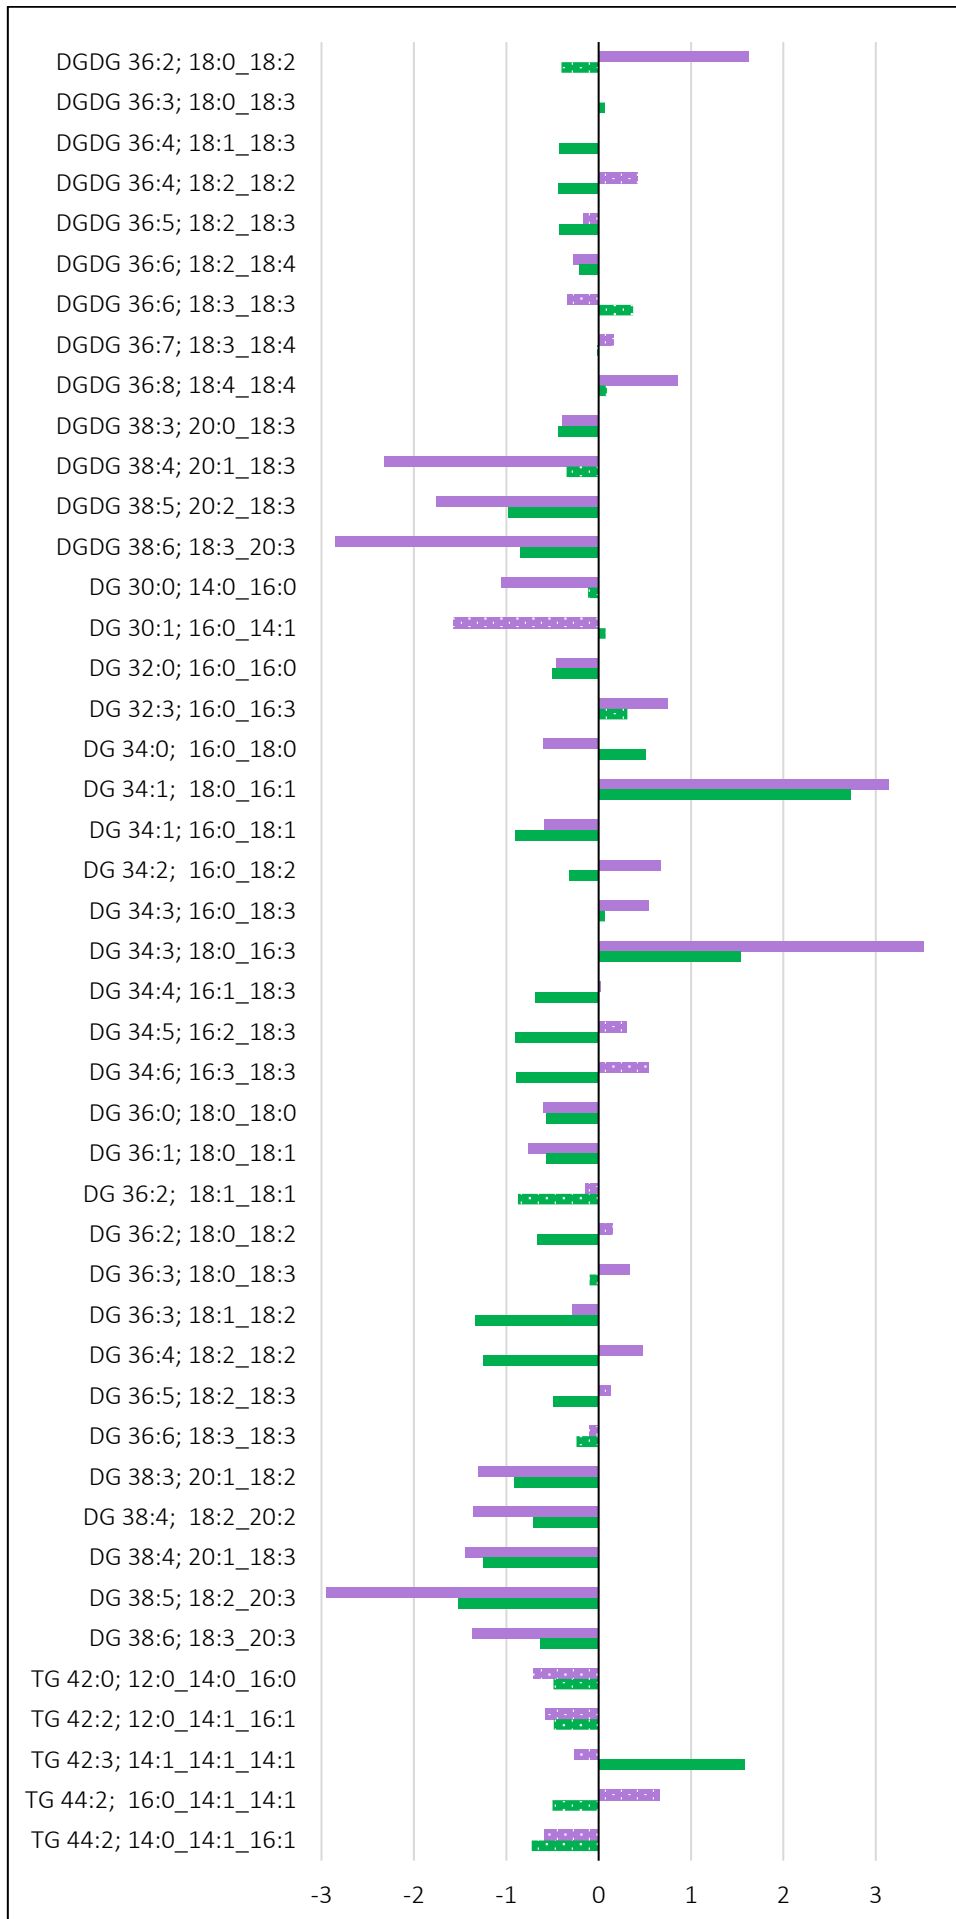

(f)

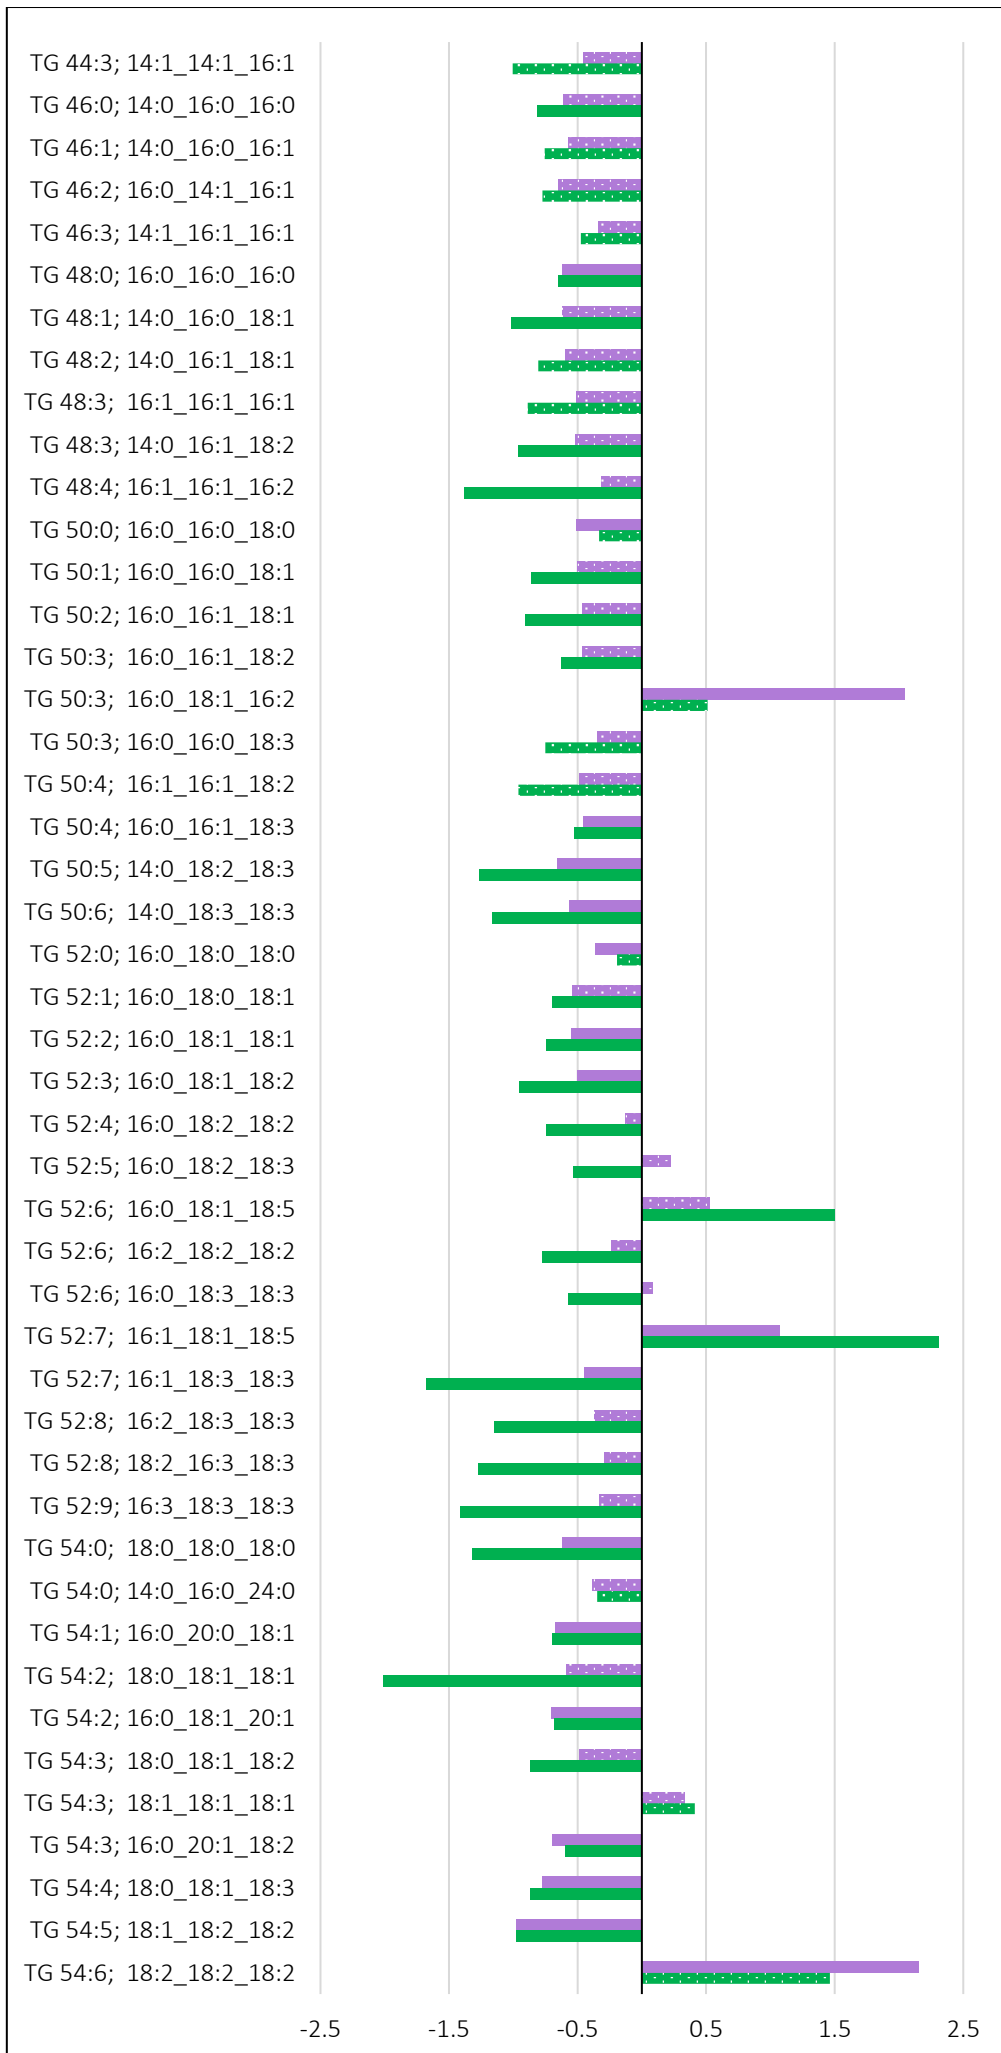

(g)

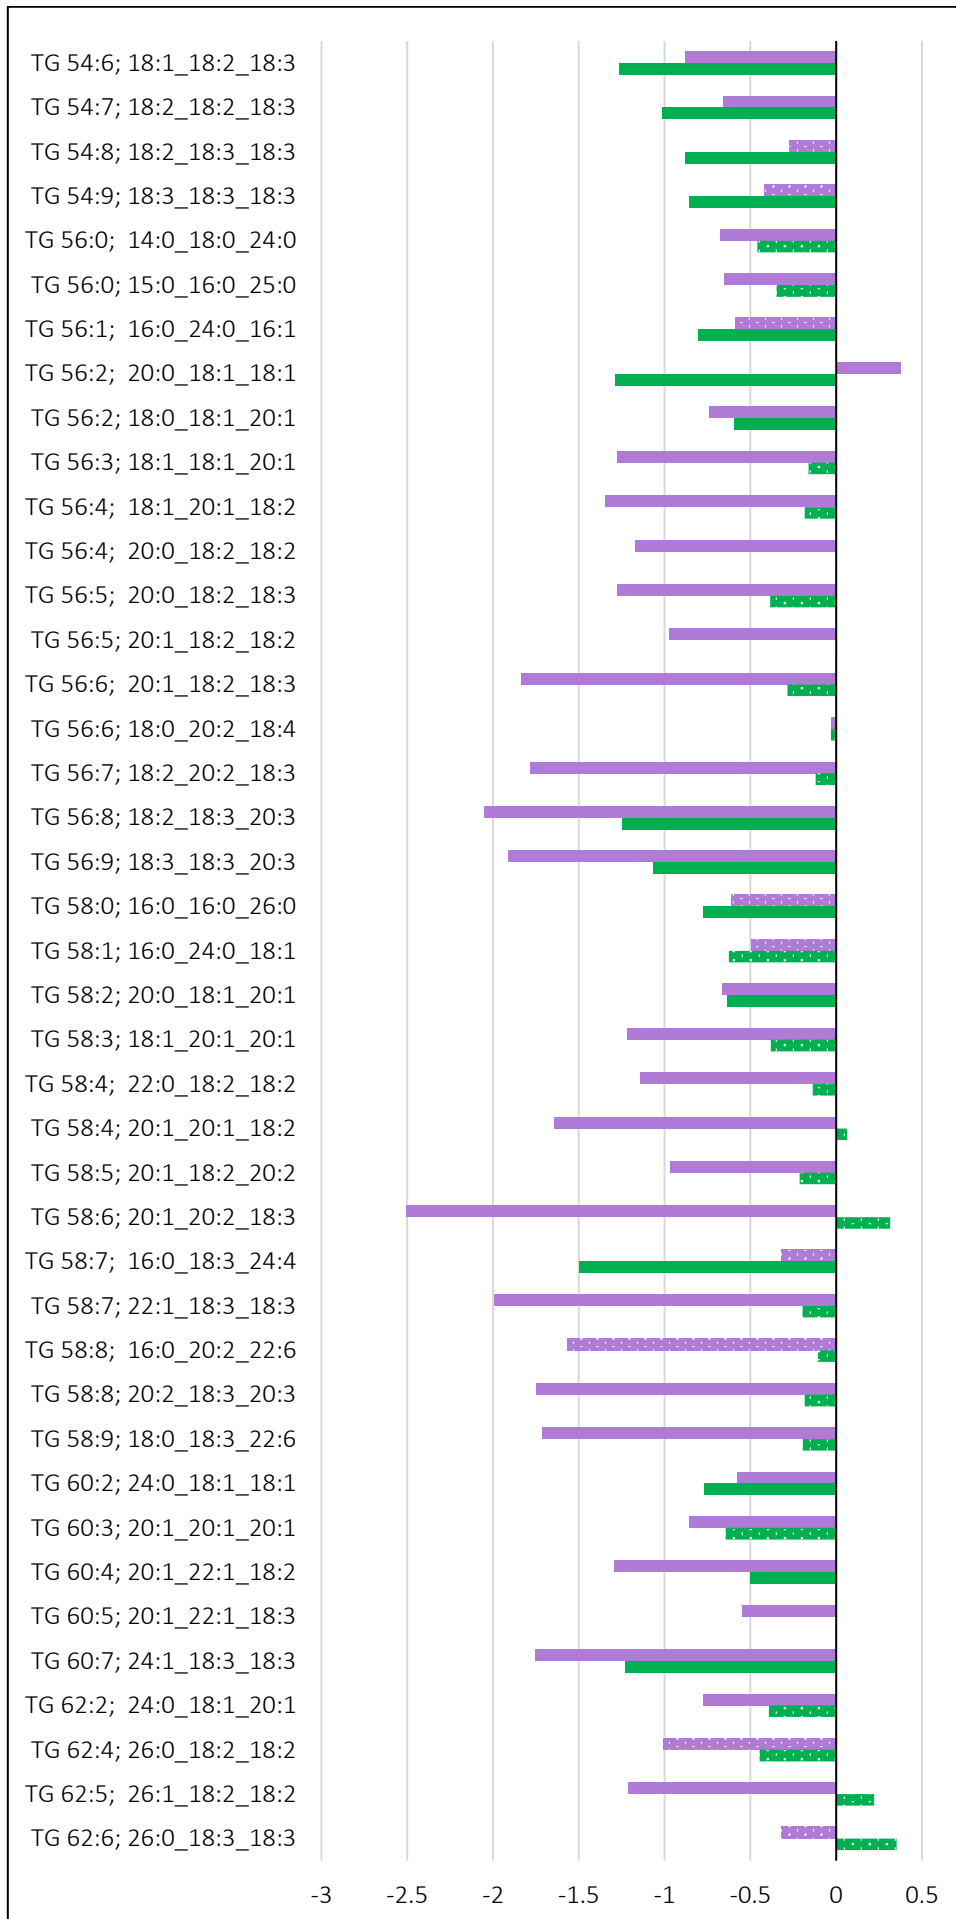

Figure S4 (a-f) Log2 fold change comparison of the levels of lipid species in the first internode compared to the second internode of 28 d old plants ( $\text{Log}_2$  first internode/ second internode)

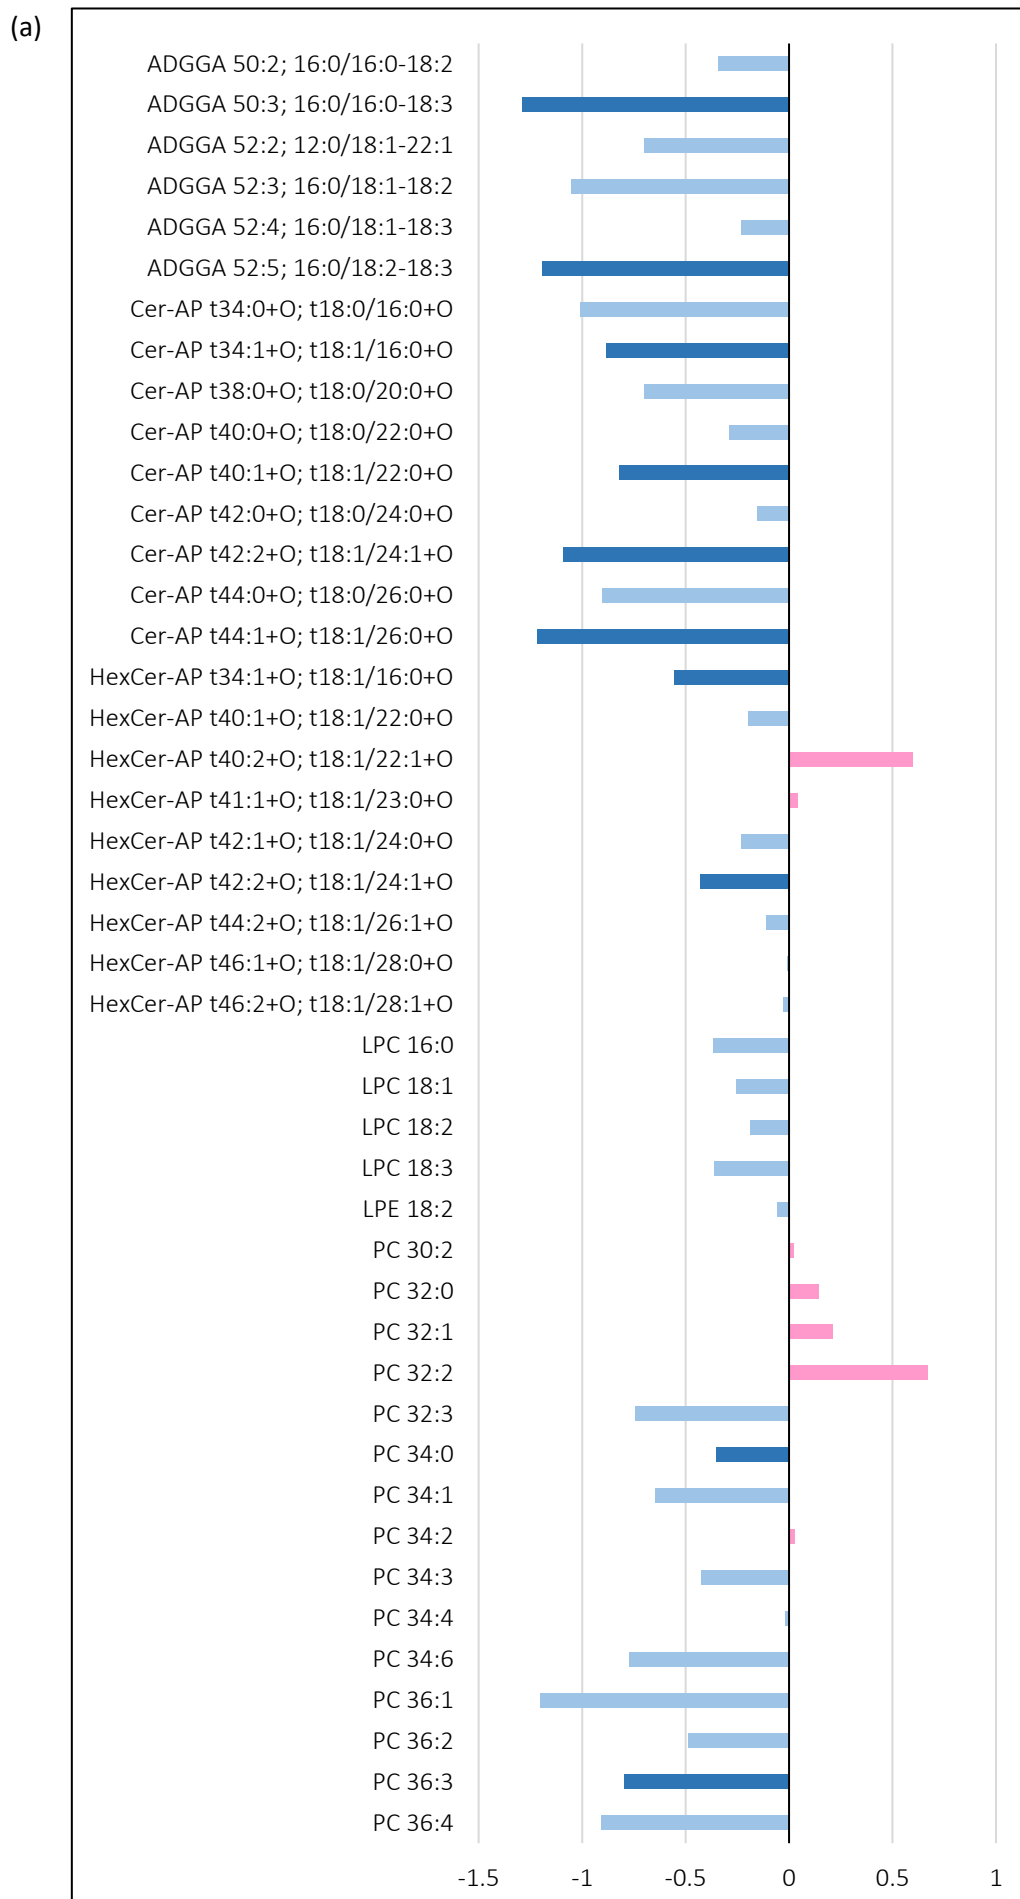

(b)

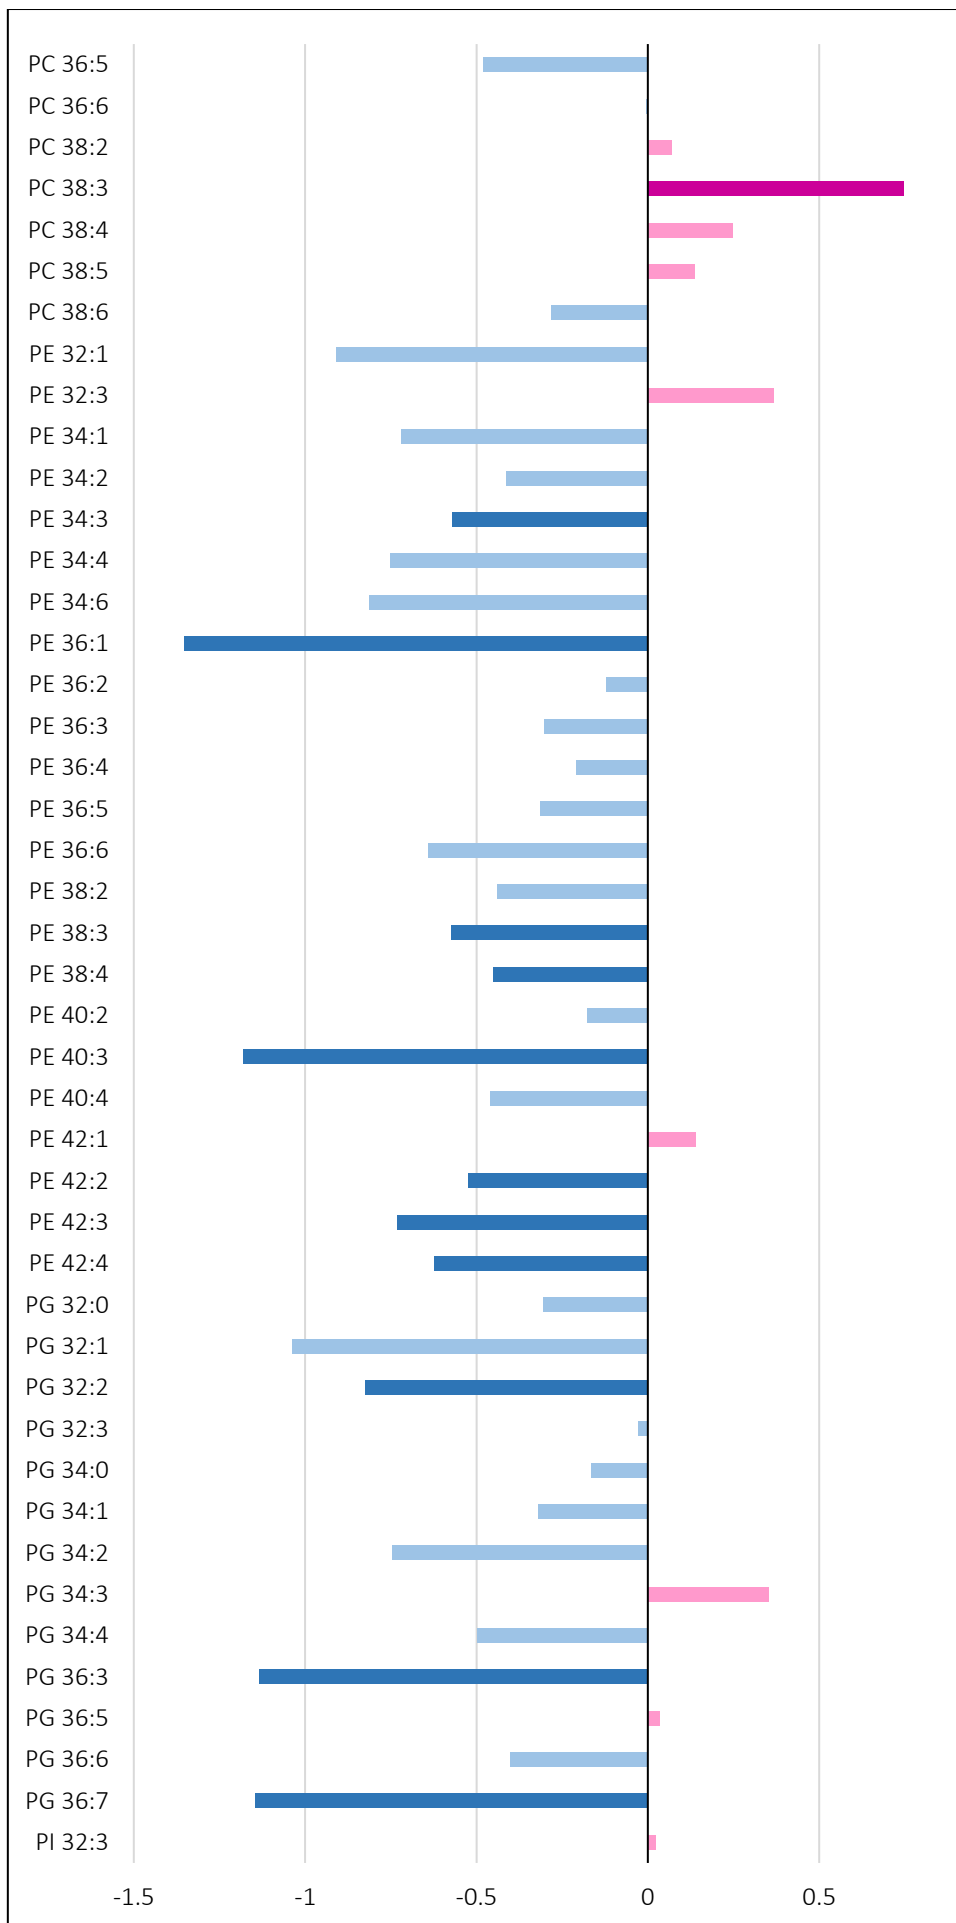

(c)

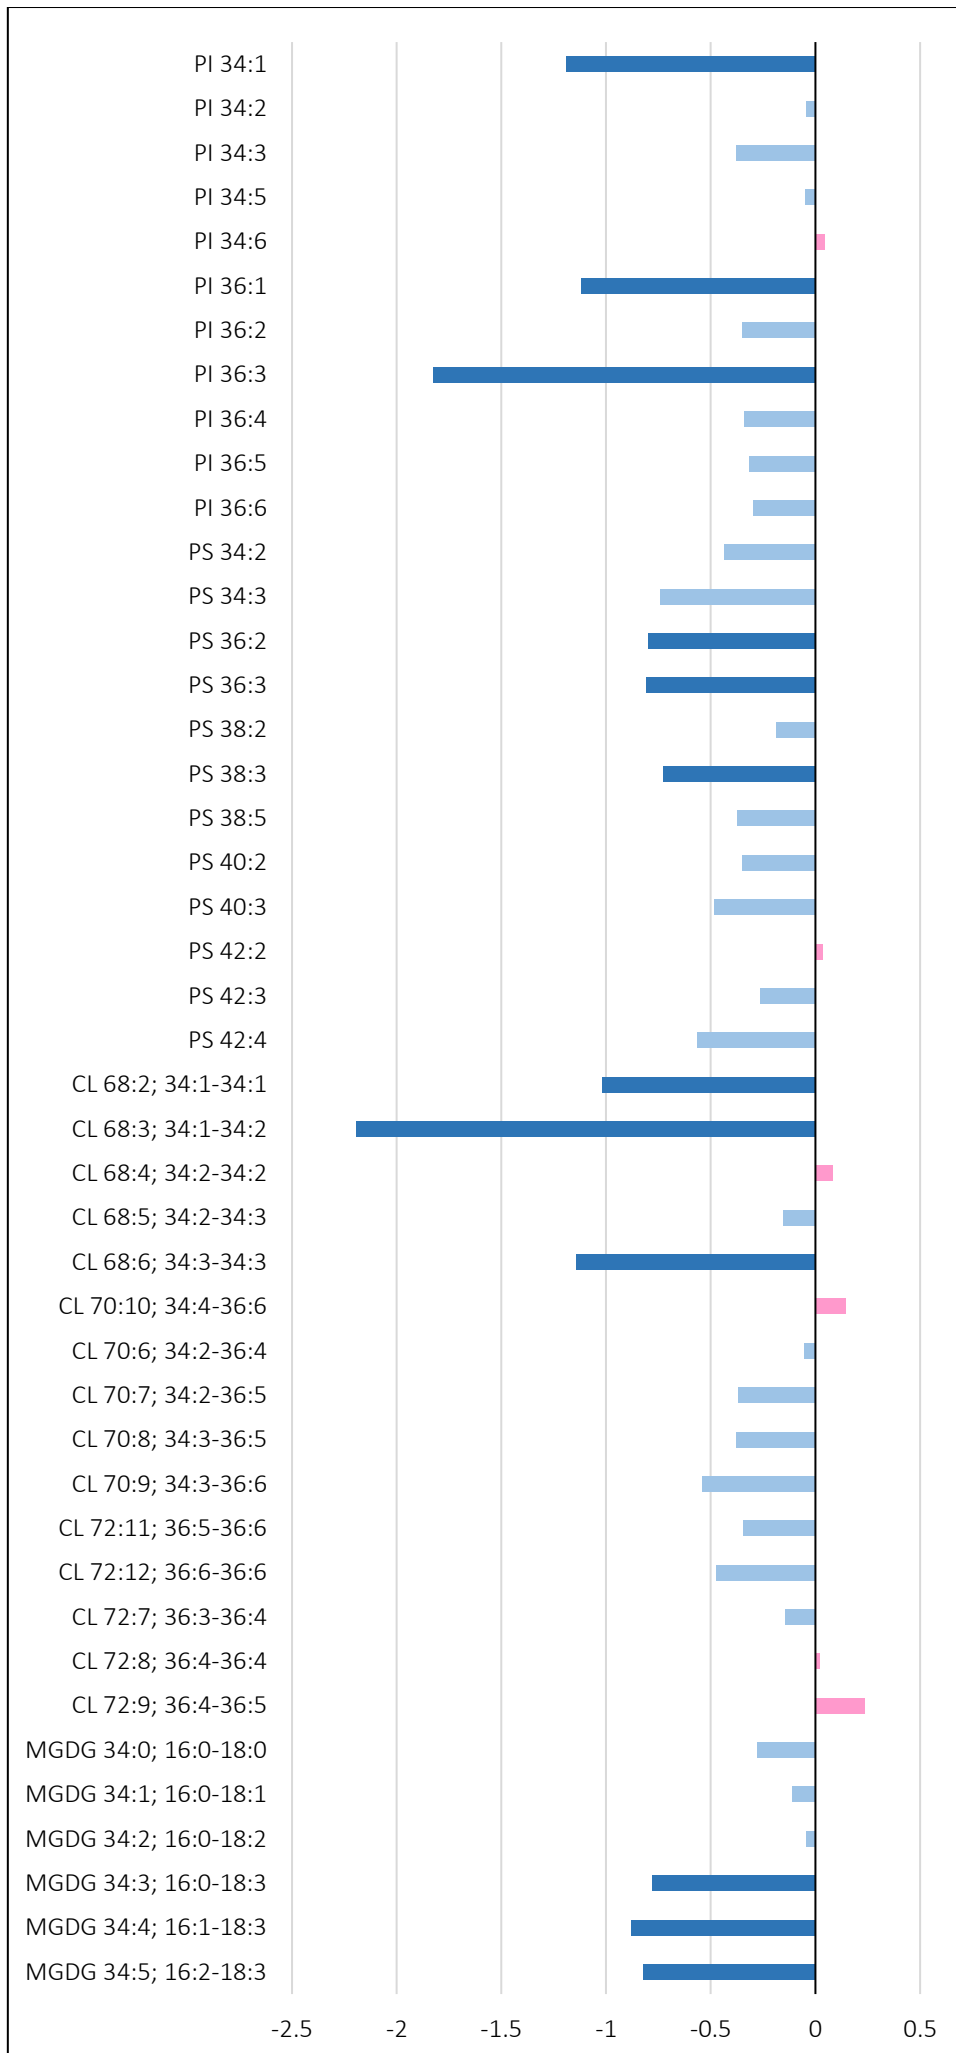

(d)

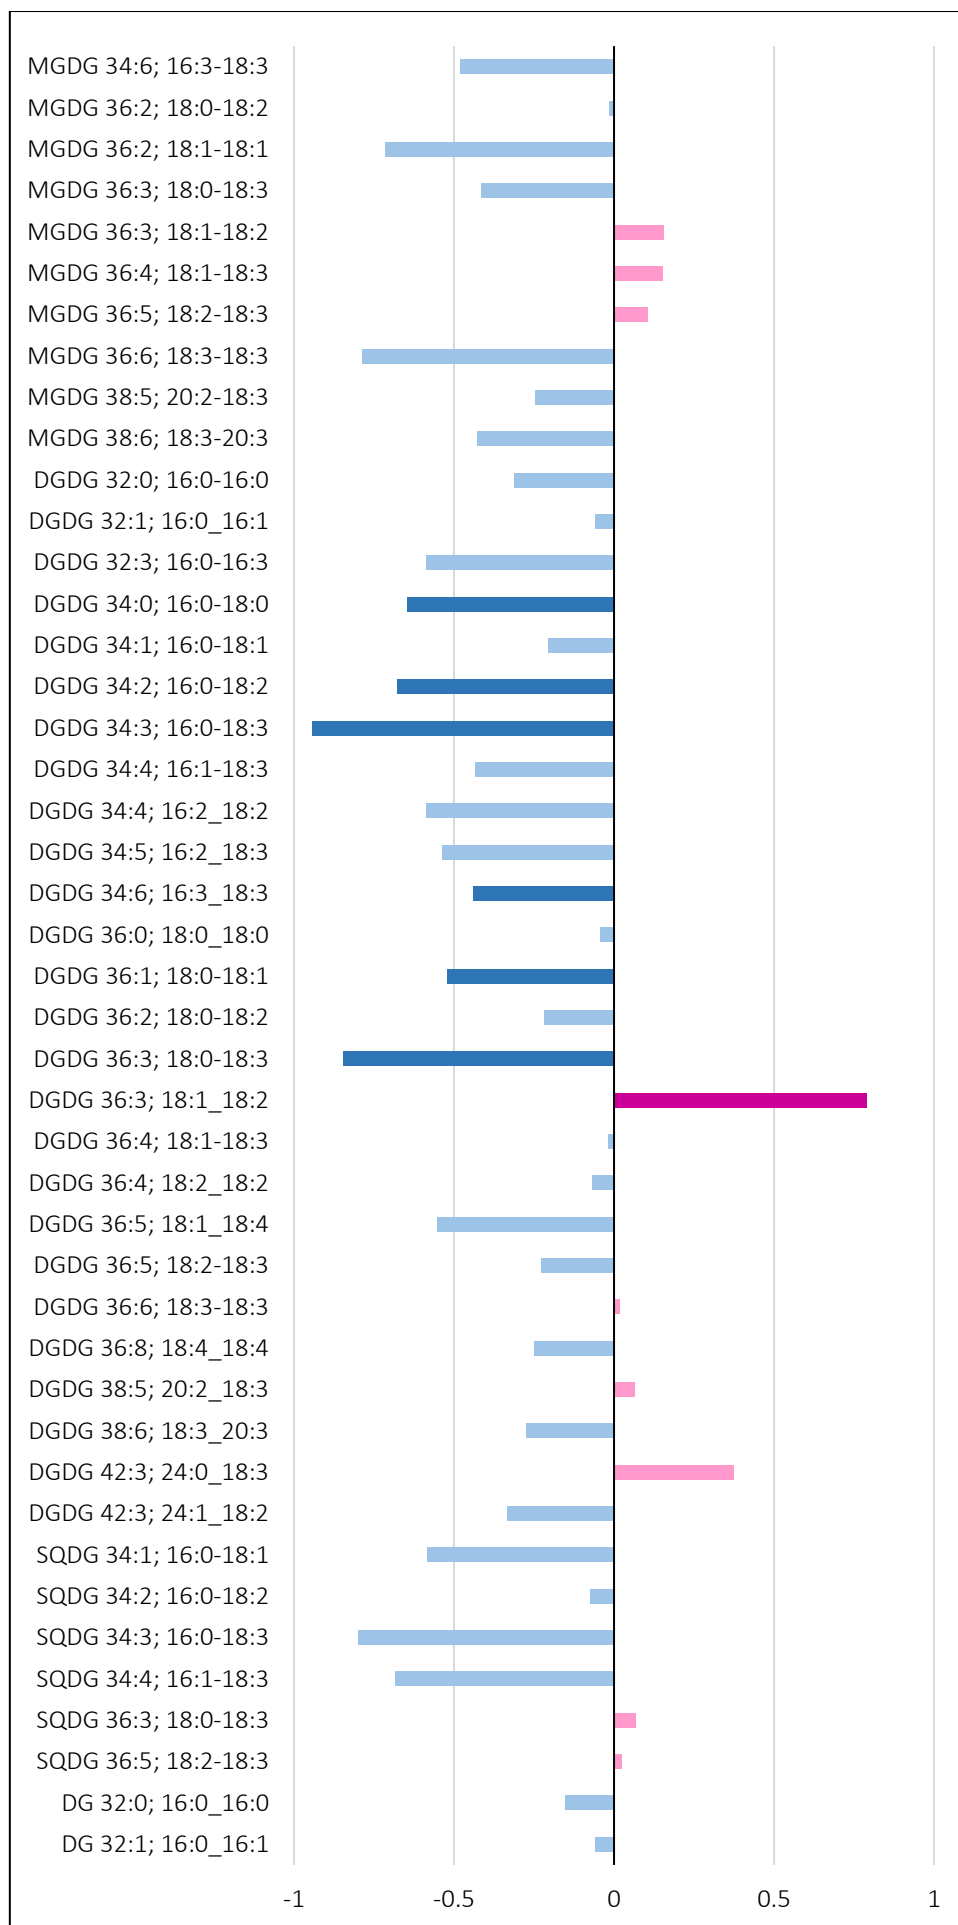



(e)

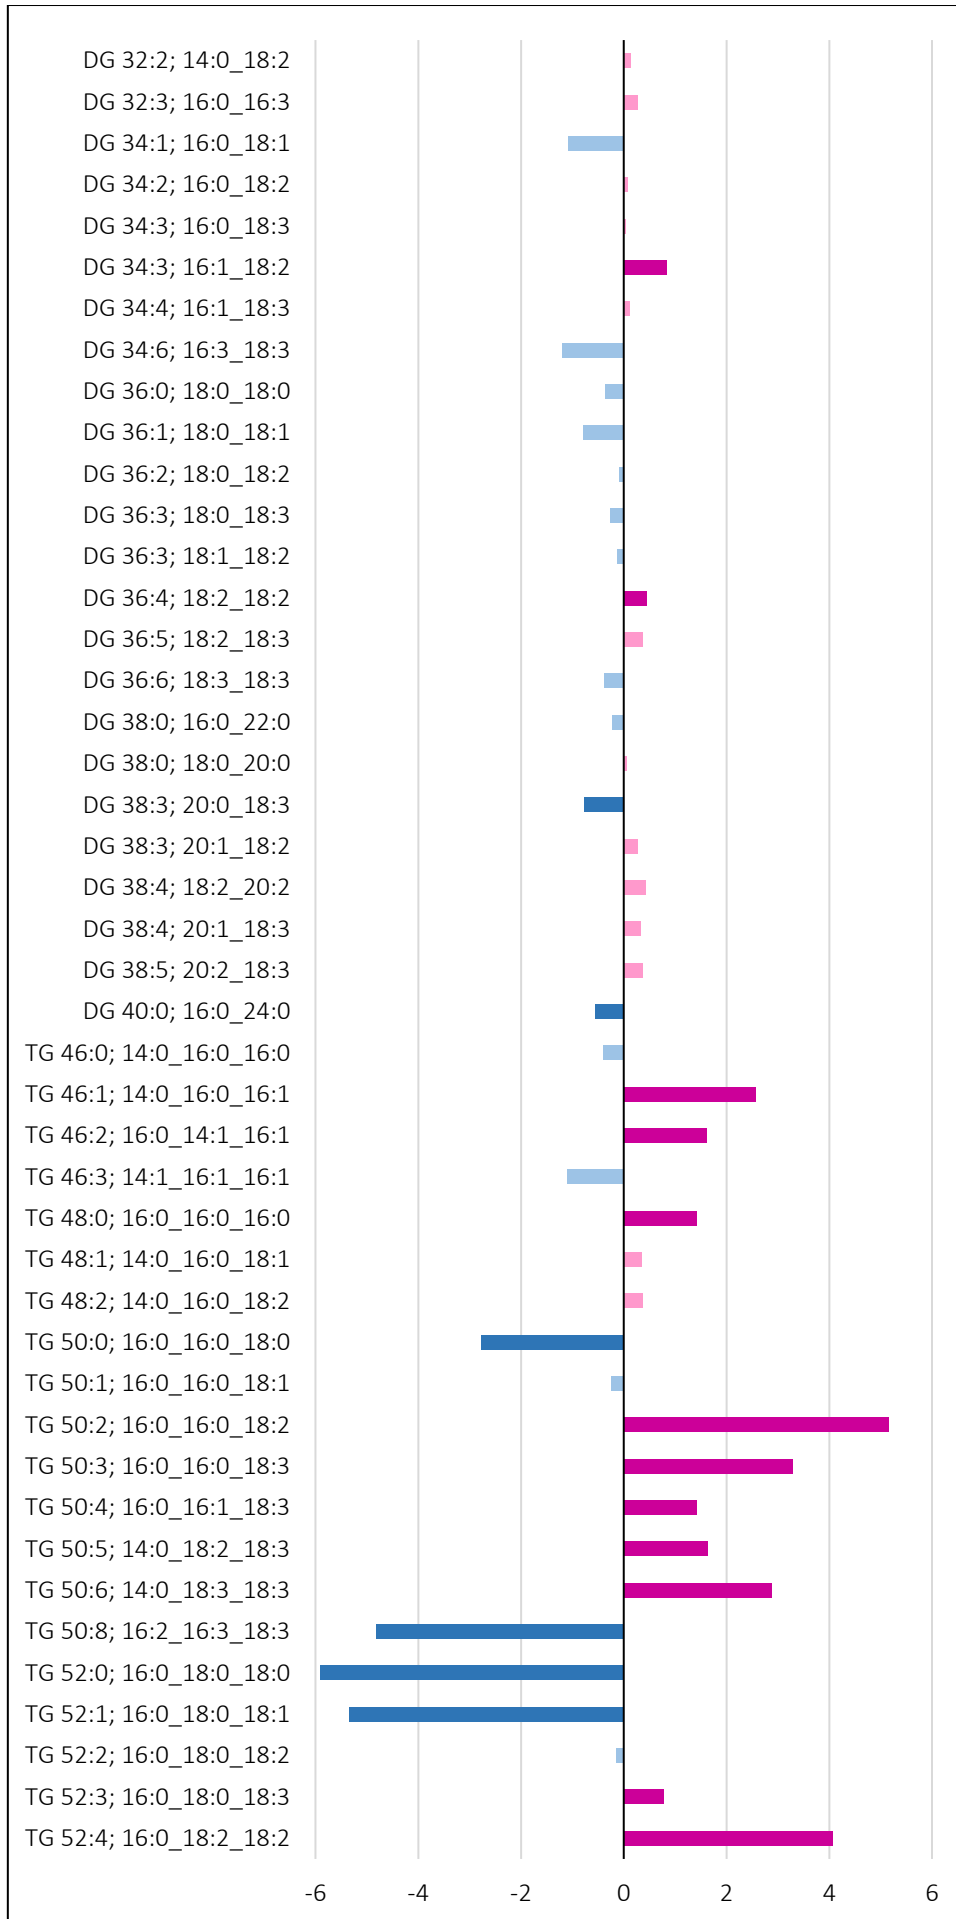

(f)

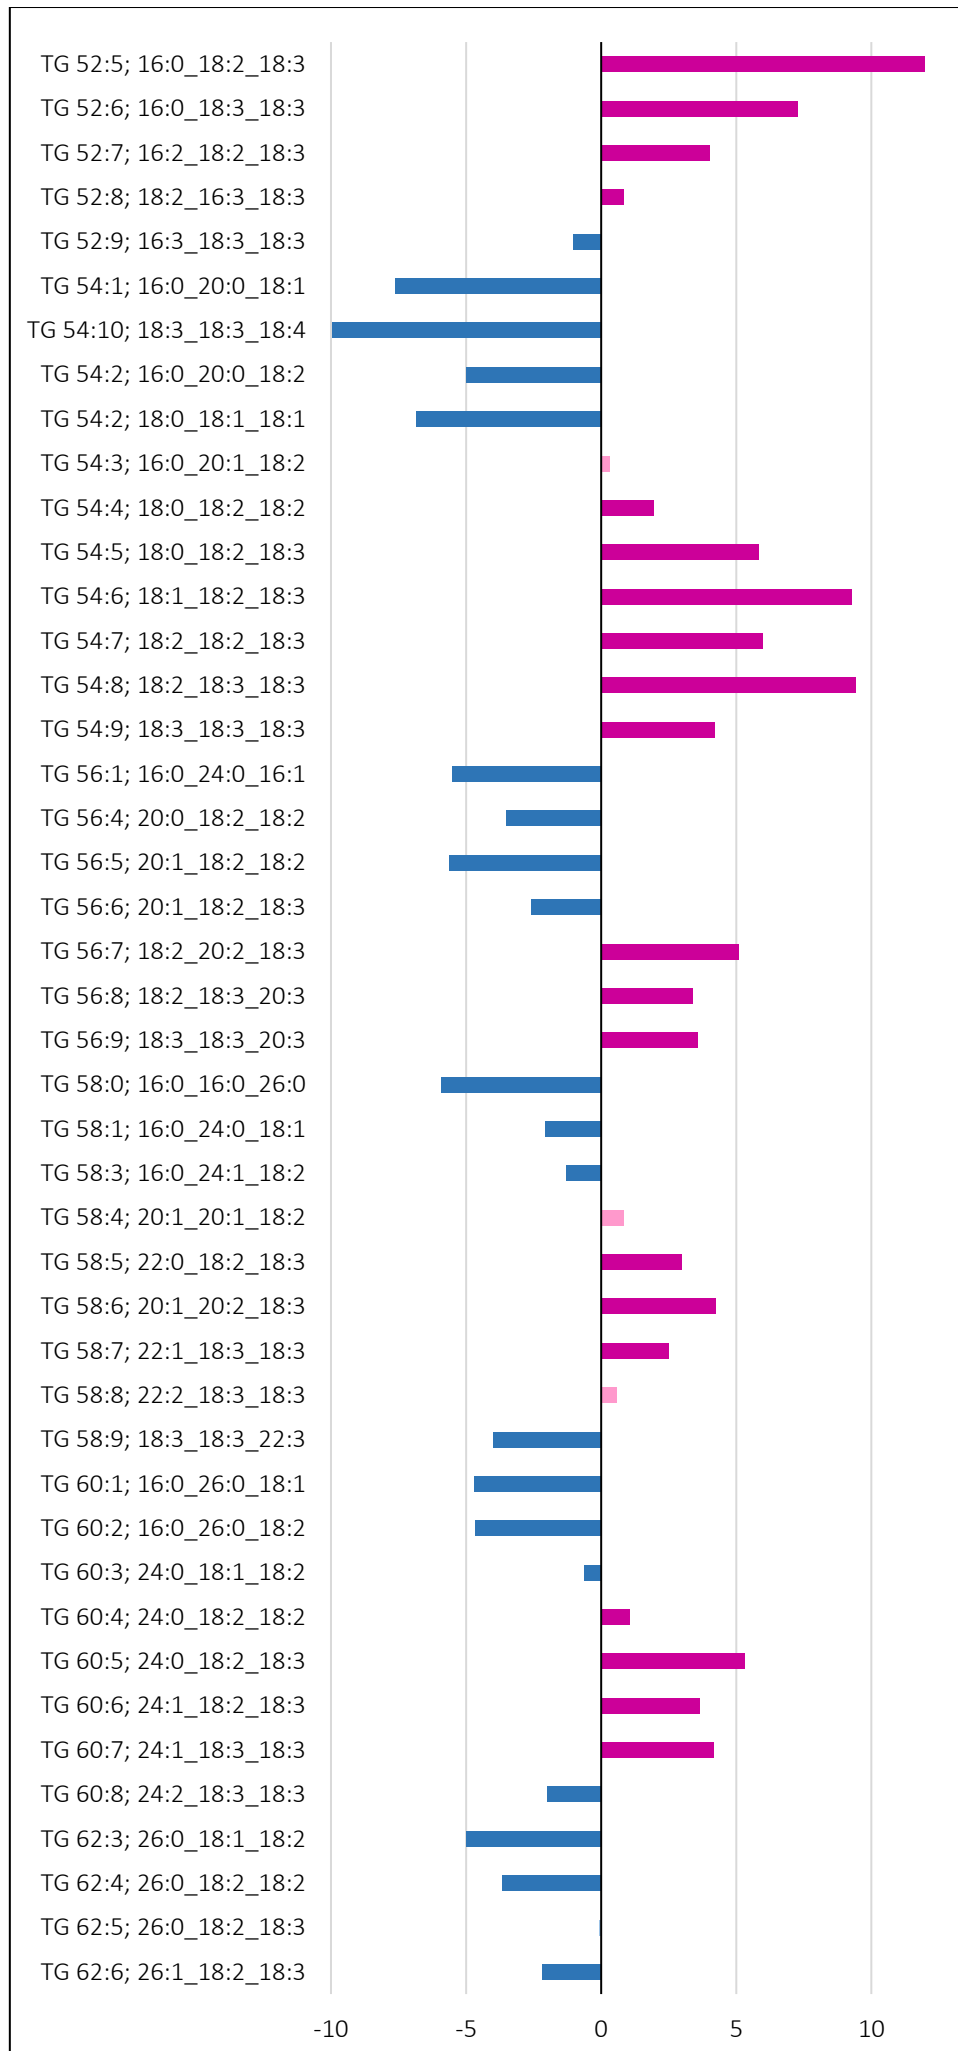

Figure S5 (a-h) Log<sub>2</sub> fold change comparison of the levels of lipid species in 1.2 cm long siliques compared to 1 cm long siliques (Log<sub>2</sub> 1.2 cm/1 cm) (blue bars) and in 1.5 cm long siliques compared to 1.2 cm long siliques (Log<sub>2</sub> 1.5 cm/ 1.2 cm) (green bars)

(a)

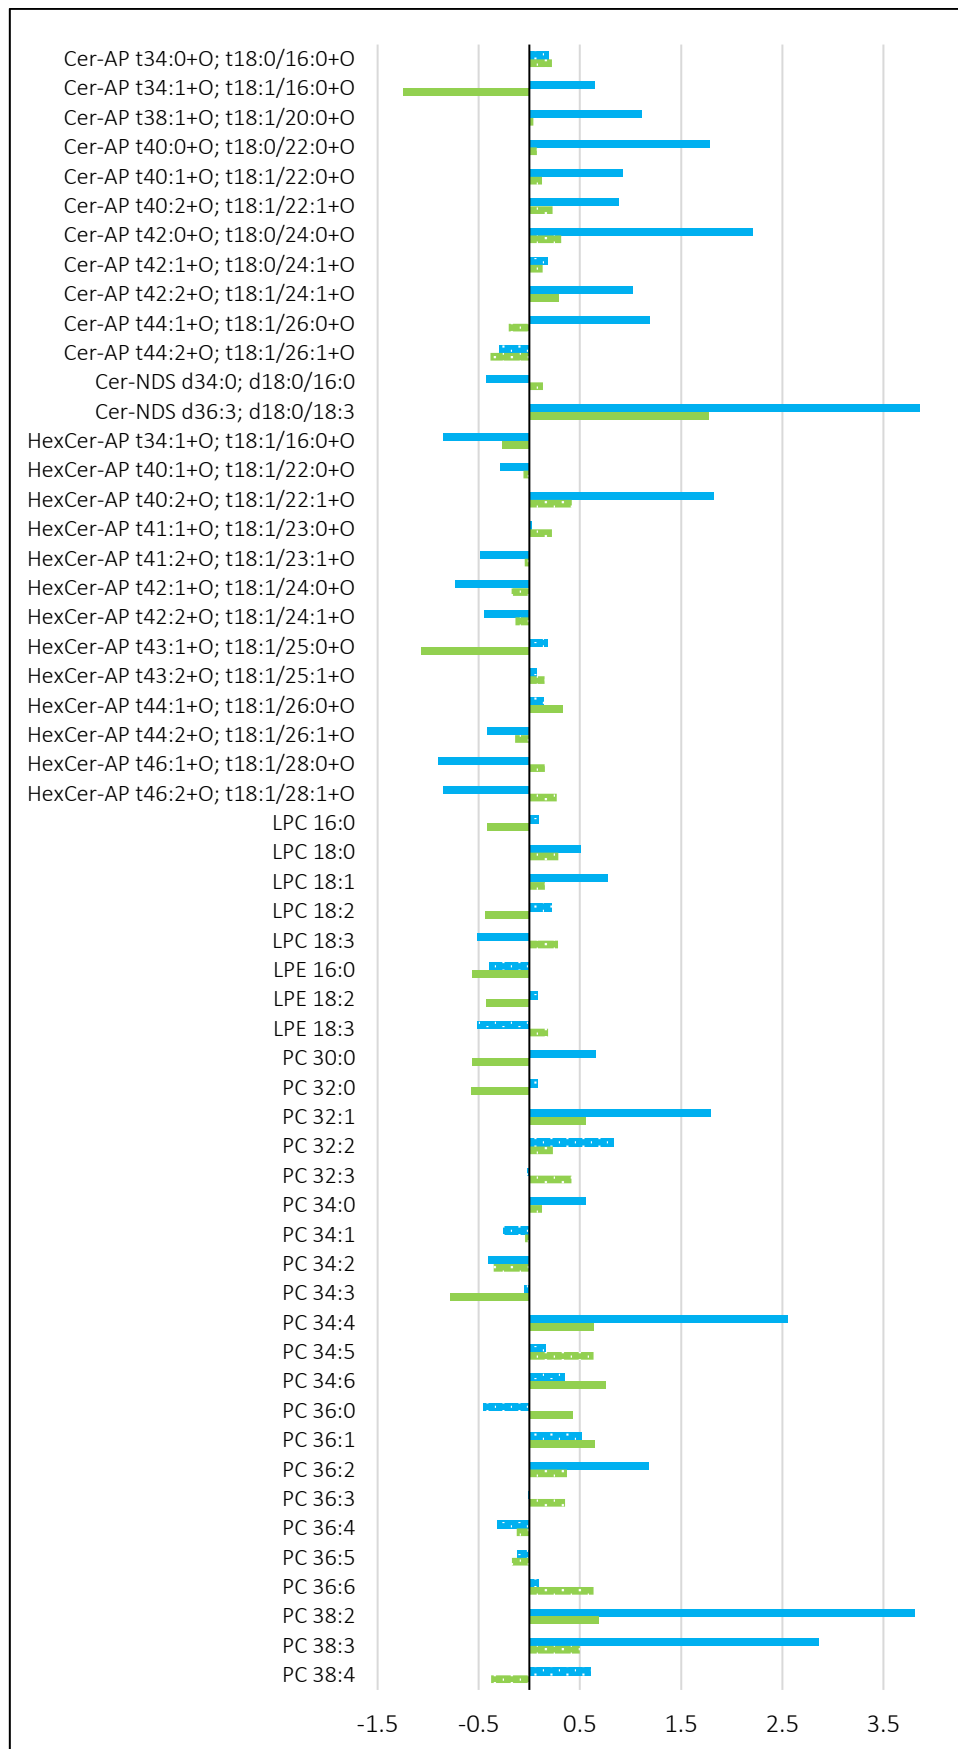

(b)

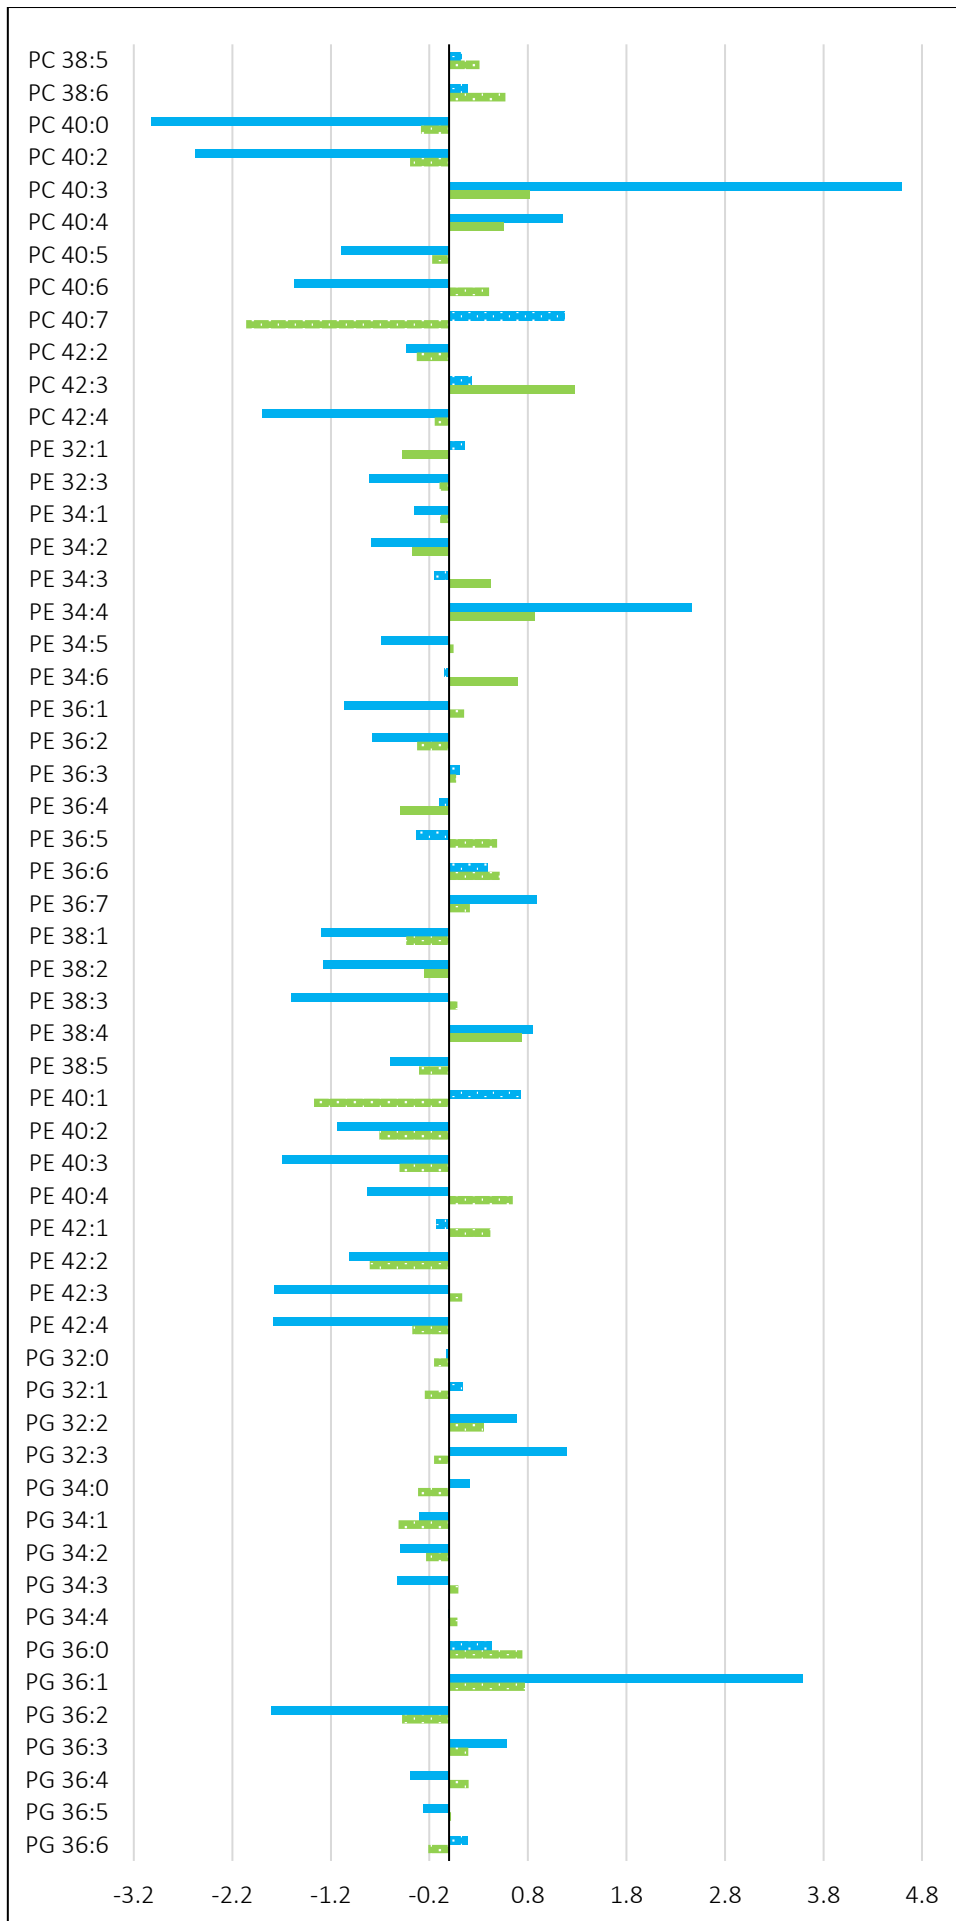

(c)

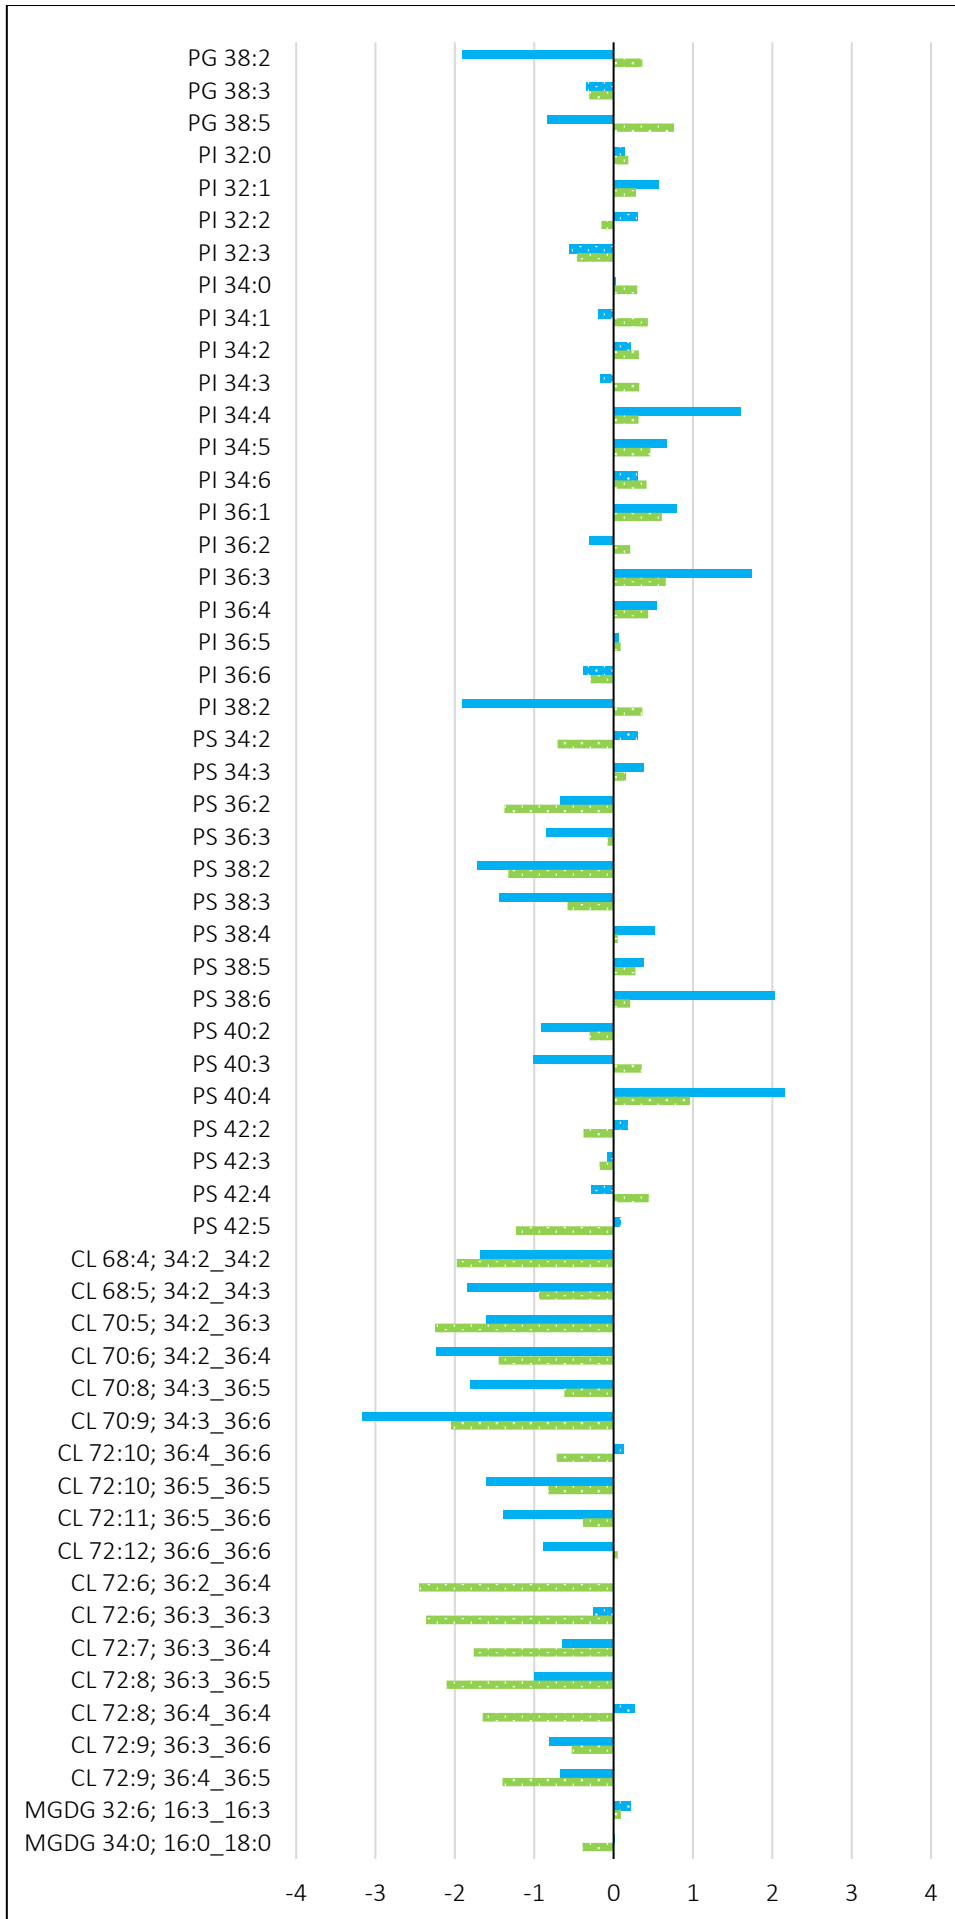

(d)

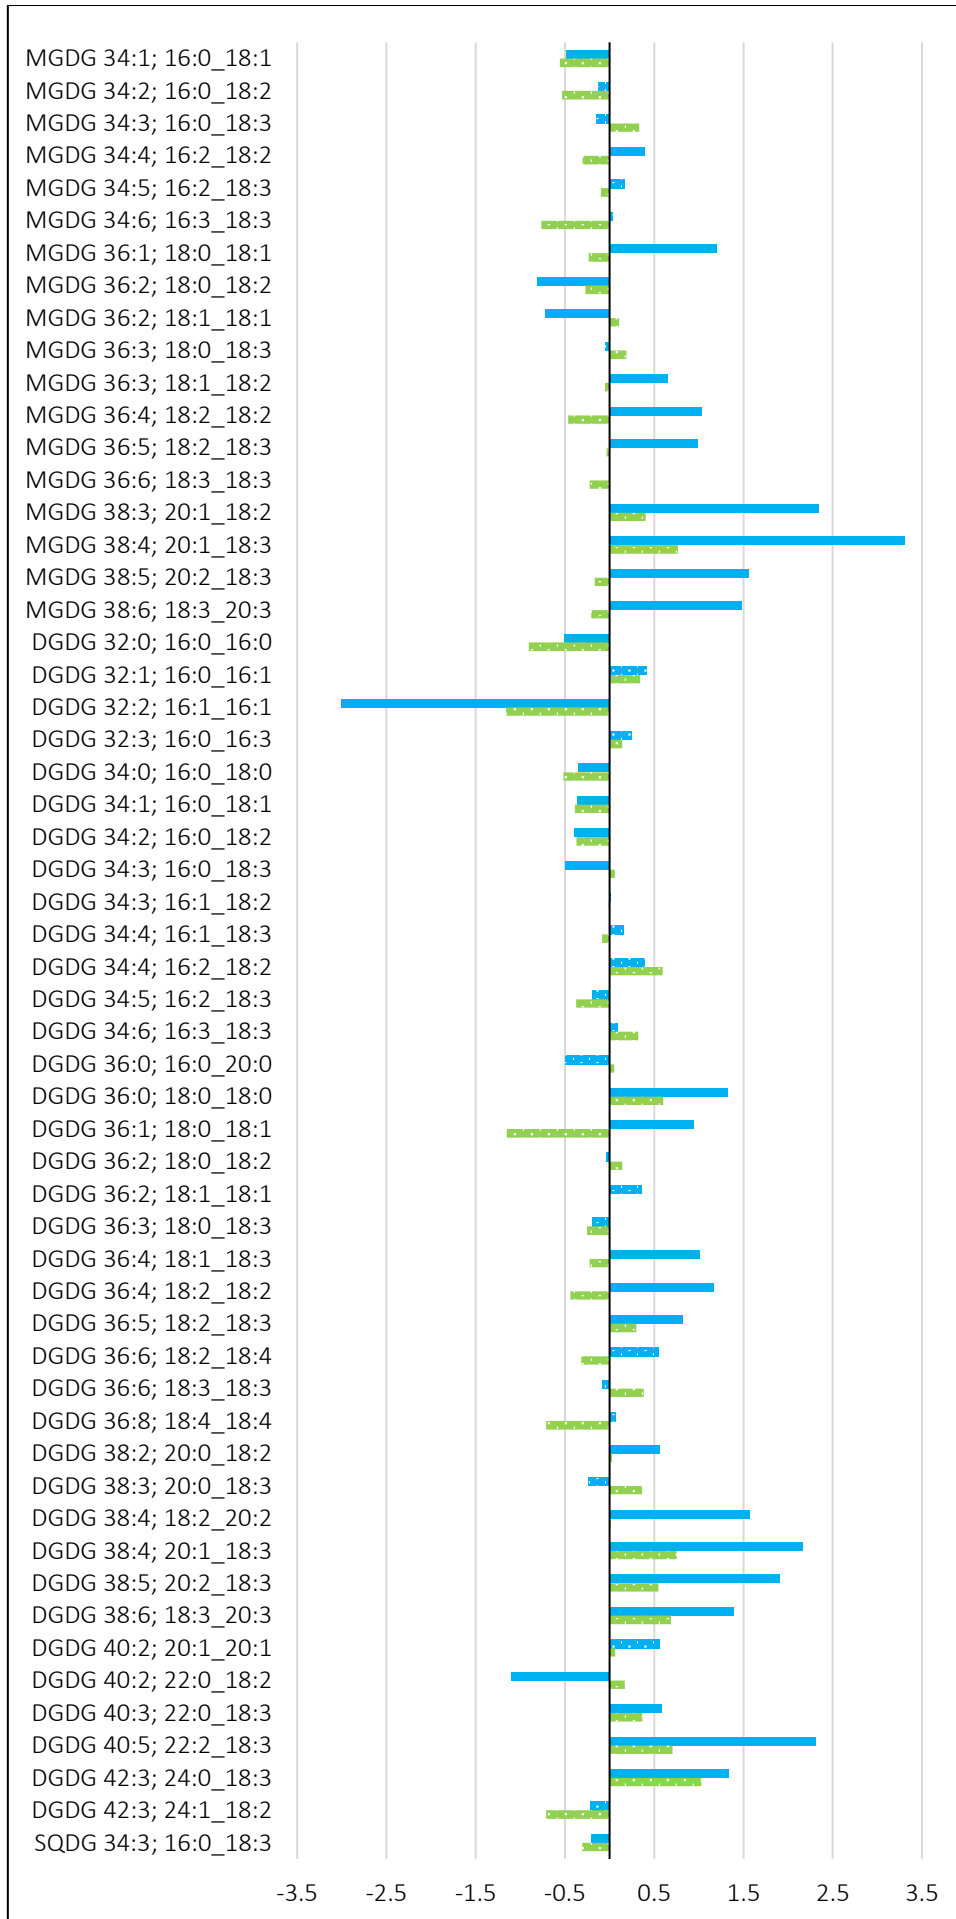

(e)

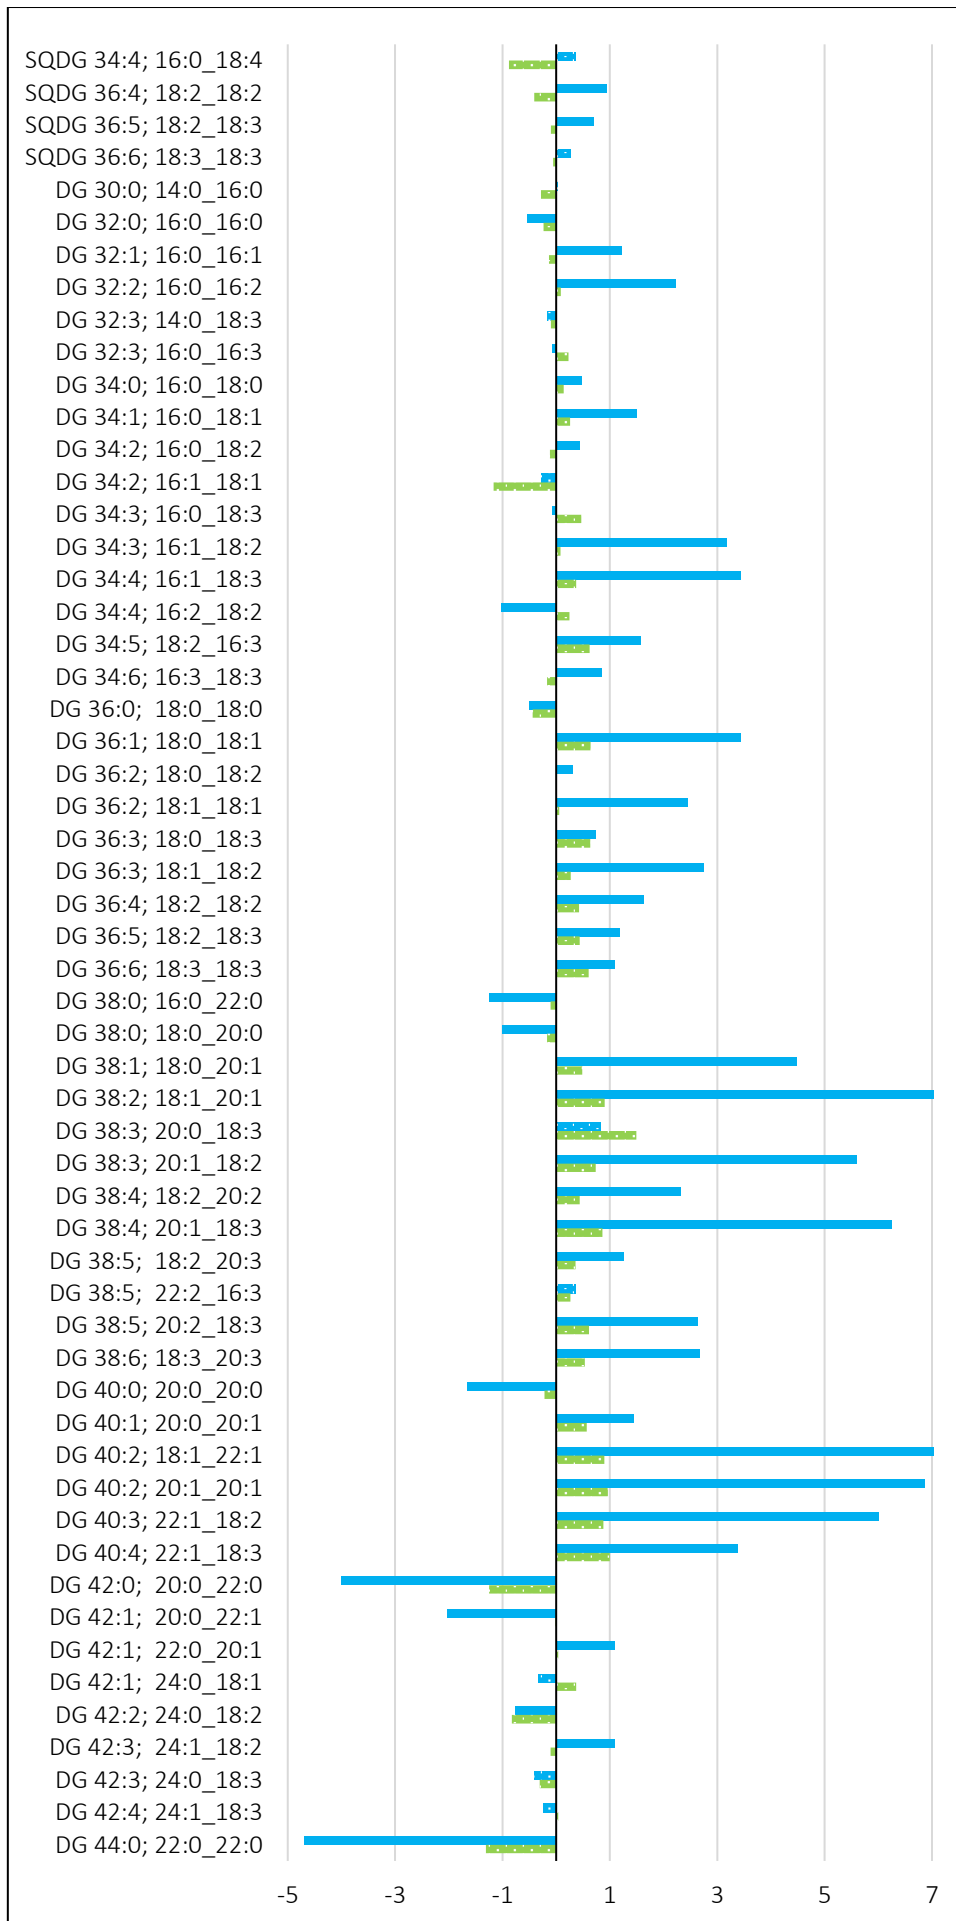

(f)

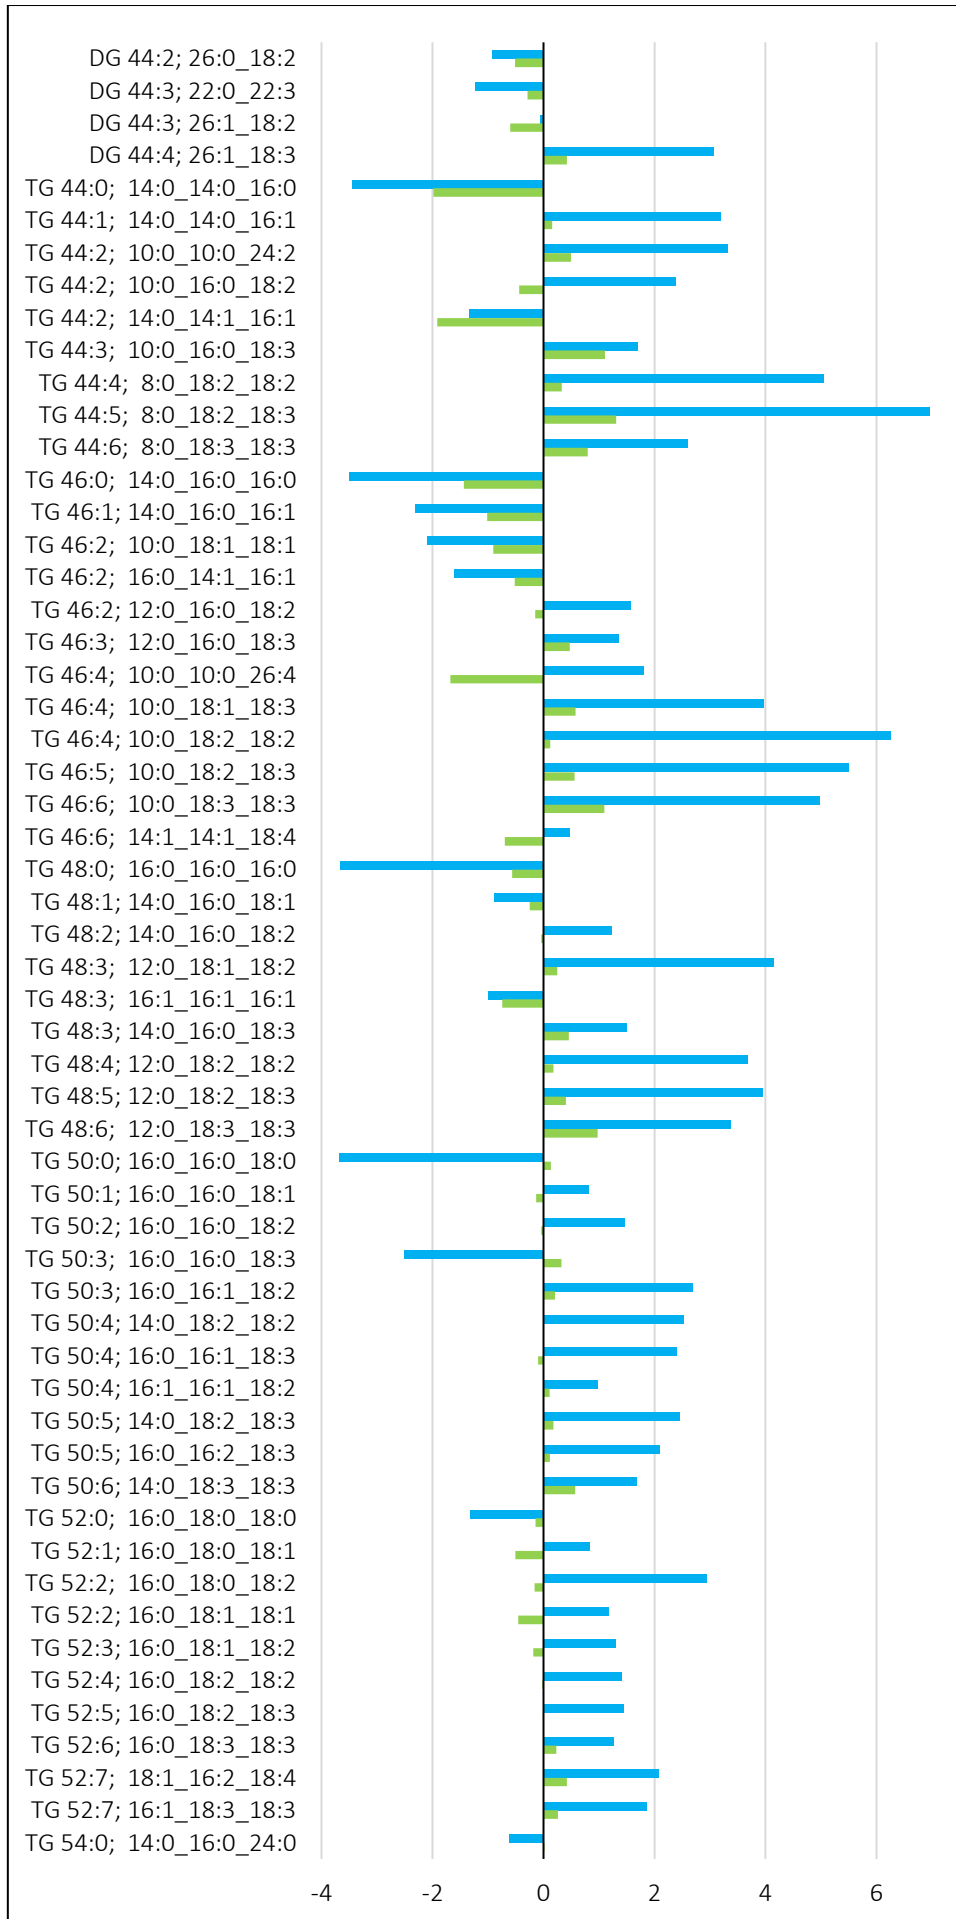



(g)

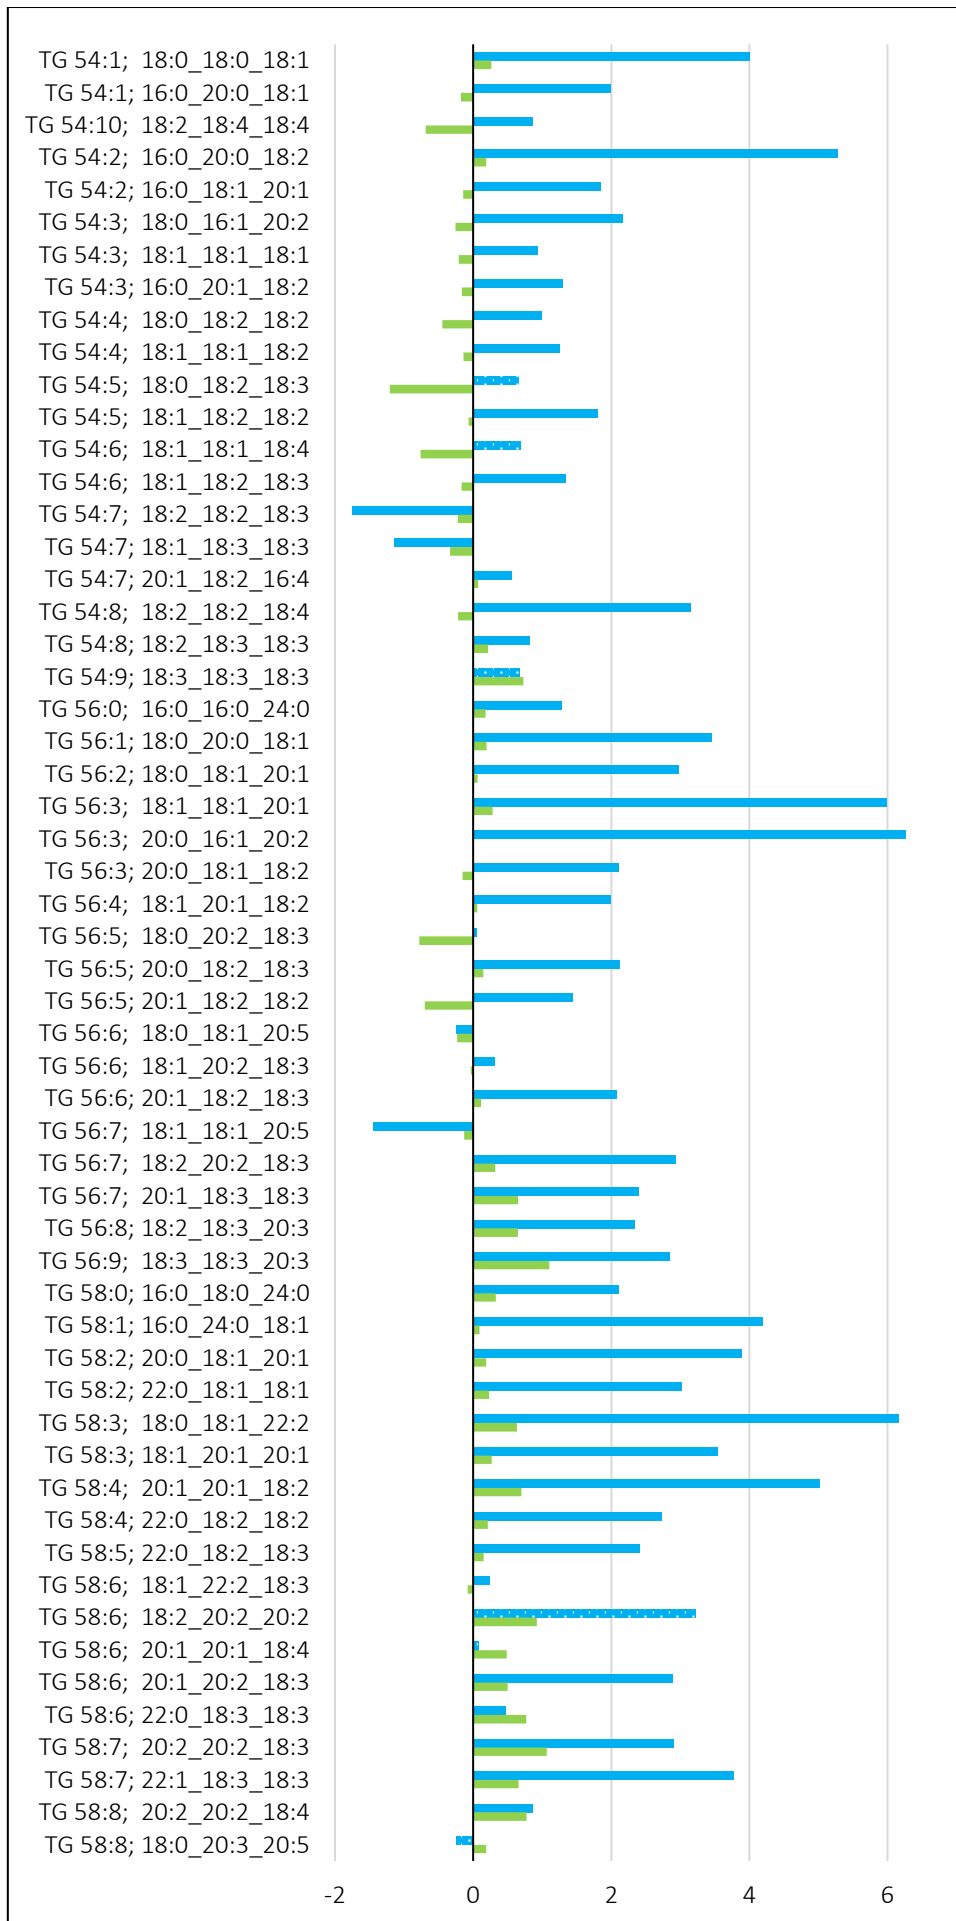

(h)

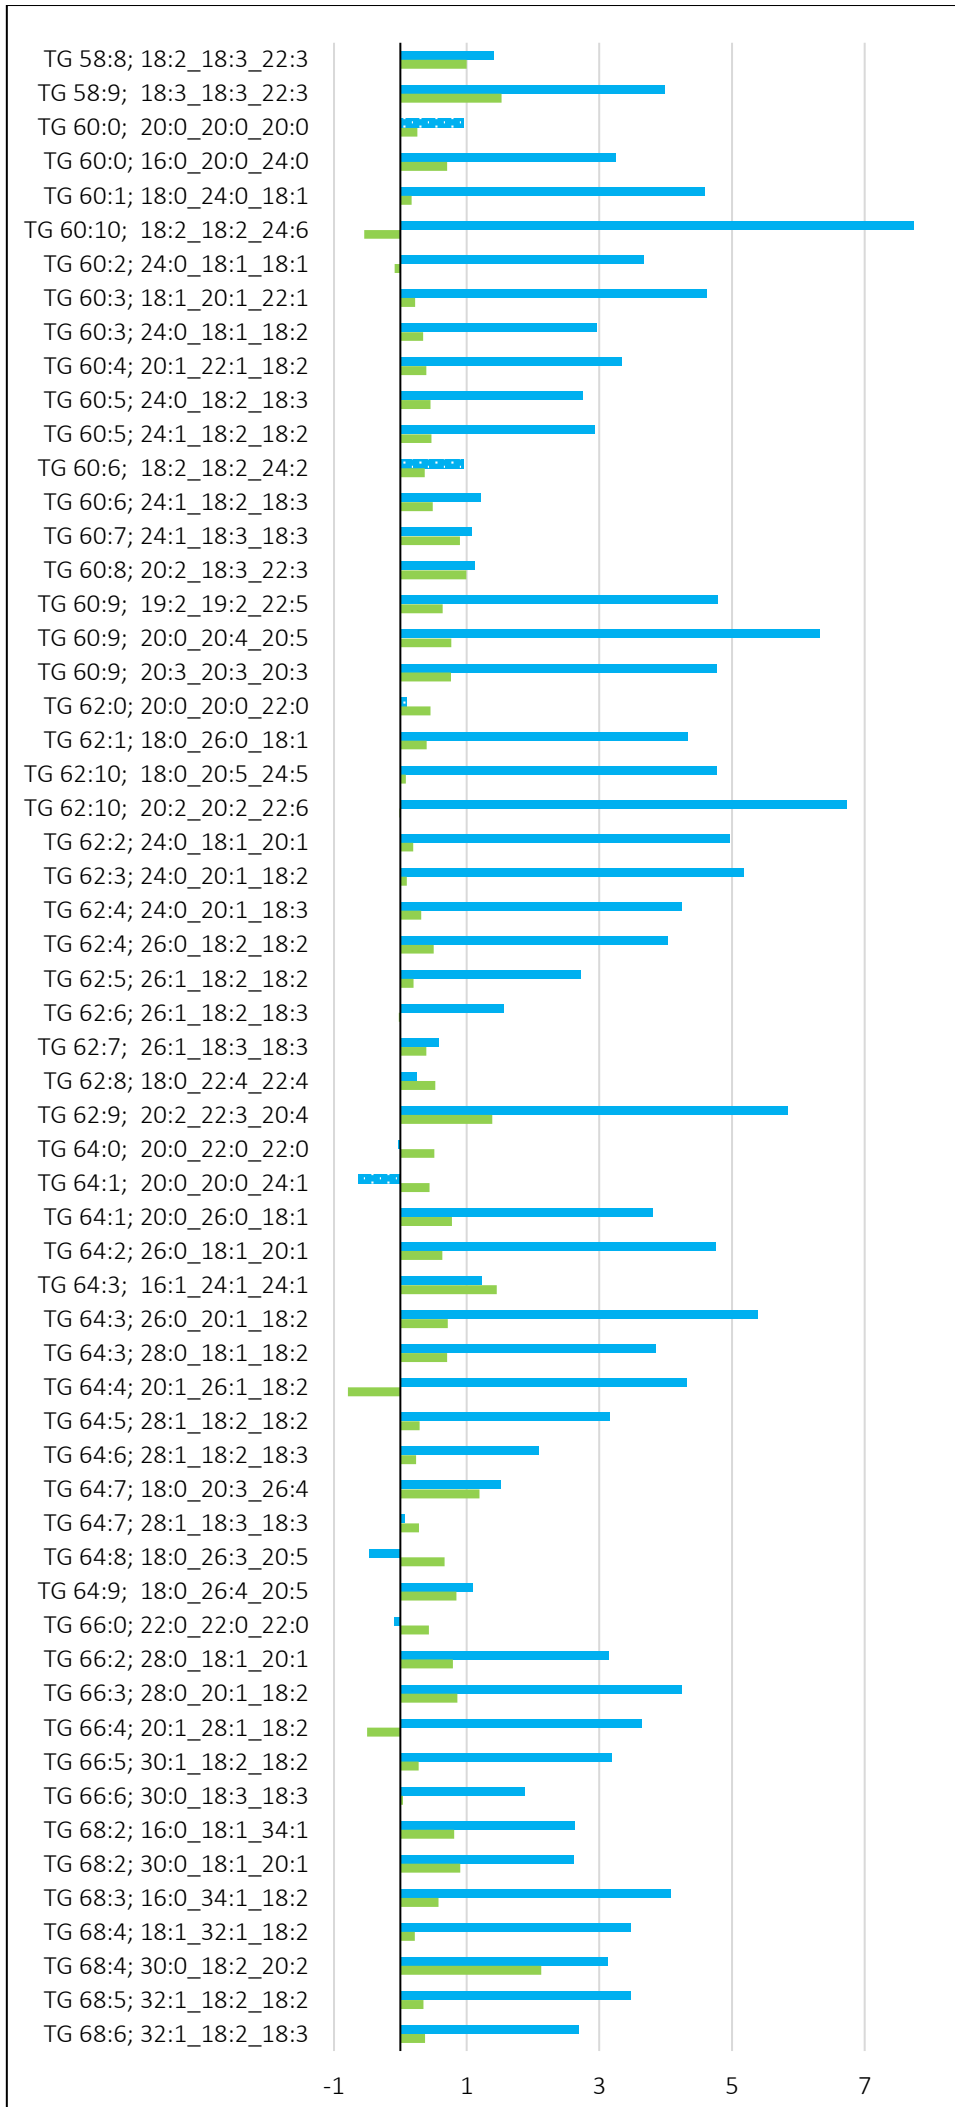

Supplement: TPJ-107-287-s002.pdf [file TPJ-107-287-s002.pdf]
